1 **Predicting Meridian in Chinese Traditional Medicine Using Machine Learning**

2 **Approaches**

3 Yinyin Wang<sup>1</sup>, Mohieddin Jafari<sup>1</sup>, Yun Tang<sup>2</sup> and Jing Tang<sup>1,3\*</sup>

4 <sup>1</sup>Research Program in Systems Oncology, Faculty of Medicine, University of Helsinki, 00290,

5 Finland

6 <sup>2</sup>Shanghai Key Laboratory of New Drug Design, School of Pharmacy, East China University of

7 Science and Technology, Shanghai, 200237, China

8 <sup>3</sup>Institute for Molecular Medicine Finland, Helsinki Institute of Life Science, University of

9 Helsinki, 00290, Finland

10 \*Corresponding author: Jing Tang, [jing.tang@helsinki.fi](mailto:jing.tang@helsinki.fi)

11

12

## 13 **Abstract**

14 Plant-derived nature products, known as herb formulas, have been commonly used in  
15 Traditional Chinese Medicine (TCM) for disease prevention and treatment. The herbs have  
16 been traditionally classified into different categories according to the TCM Organ systems  
17 known as Meridians. Despite the increasing knowledge on the active components of the herbs,  
18 the rationale of Meridian classification remains poorly understood. In this study, we took a  
19 machine learning approach to explore the classification of Meridian. We determined the  
20 molecule features for 646 herbs and their active components including structure-based  
21 fingerprints and ADME properties (absorption, distribution, metabolism and excretion), and  
22 found that the Meridian can be predicted by machine learning approaches with a top accuracy  
23 of 0.83. We also identified the top compound features that were important for the Meridian  
24 prediction. To the best of our knowledge, this is the first time that molecular properties of the  
25 herb compounds are associated with the TCM Meridians. Taken together, the machine  
26 learning approach may provide novel insights for the understanding of molecular evidence of  
27 Meridians in TCM.

## 28 **Author Summary**

29 In East Asia, plant-derived natural products, known as herb formulas, have been commonly  
30 used as Traditional Chinese Medicine (TCM) for disease prevention and treatment. According  
31 to the theory of TCM, herbs can be classified as different Meridians according to the balance of  
32 Yin and Yang, which are commonly understood as metaphysical concepts. Therefore, the  
33 scientific rational of Meridian classification remains poorly understood. The aim of our study  
34 was to provide a computational means to understand the classification of Meridians. We  
35 showed that the Meridians of herbs can be predicted by the molecular and chemical features

36 of the ingredient compounds, suggesting that the Meridians indeed are associated with the  
37 properties of the compounds. Our work provided a novel chemoinformatics approach which  
38 may lead to a more systematic strategy to identify the mechanisms of action and active  
39 compounds for TCM herbs.

## 40 **1. Introduction**

41 Single-agent drug discovery has often experienced low success rates which can be largely  
42 attributed to the lack of efficacy as well as unsatisfactory safety, especially when treating  
43 complex diseases such as cancer [1] and diabetes [2]. Recently, polypharmacology that  
44 involves multi-drug combinations acting on distinct targets has been proposed as a paradigm  
45 shift of drug discovery [3]. However, without a systems-level understanding of disease and  
46 drug interactions, it maintains a challenge to develop a valid strategy for the rational selection  
47 of drug combinations. In East Asia, plant-derived natural products, known as herb formulas,  
48 have been commonly used in Chinese Traditional Medicine (TCM) for disease prevention and  
49 treatment. Herb formulas often involve multiple bioactive components to produce synergistic  
50 effects in a personalized medicine manner, aiming for maximal therapeutic efficacy as well as  
51 minimal side effects [4]. For example, the Fufang Danshen Diwan (*Dantonic pill*), a botanical  
52 drug consisting of extracts of Danshen (*Radix Salviae Miltiorrhizae*) and Sanqi (*Radix*  
53 *Notoginseng*) is currently approved in 26 countries outside the USA for the treatment and  
54 prevention of chronic stable angina pectoris and other cardiovascular disease related  
55 conditions [5]. In this regard, understanding the bioactive components and their mechanisms  
56 of action for herb formulas might provide important insights on the rational design of multi-  
57 drug combinations for complex diseases [6, 7].

58 The prescription of herb formulas in TCM has been based on a holistic principle to  
59 model the human body as a miniature system that resemble the universe, which is composed

60 of five interacting Elements (metal, wood, water, fire and earth)[8]. Similar to other schools of  
61 systems medicine, the cause of diseases or symptoms can be perceived as the loss of balance  
62 between these Five Elements [9, 10]. Treating a given disease is therefore equivalent to  
63 restoring the balance in the system [11], which can be achieved by either acupuncture [12,  
64 13] or herb formulas that tune specifically certain inner channels of the body, known as  
65 Meridians [14]. There are 12 principal Meridians, each of which is linked to a specific TCM  
66 Organ and can be further attributed to one of the Five Elements (**Table 1**). The concept of  
67 Organ in TCM is fundamentally different from that of modern anatomic perspective, as the  
68 Organs in TCM represent certain distinct states of the human body, rather than a  
69 morphological structure. Similarly, although the Meridian system has been established as a  
70 fundamental basis of TCM several thousand years ago, it is not coincided to the known  
71 patterns of blood vessels or central nervous system [15]. More recently, fascia networks [16]  
72 and perivascular space [17] have been proposed to explain Meridian, but neither of them have  
73 been experimentally confirmed.

74 **Table 1.** The Meridians and their example herbs. Each Meridian is linked to a particular Organ  
75 which is characterized by its Elements and Quality of Yin or Yang. TCM considers a disease a  
76 result of loss of balance in the Yin and Yang, which can be restored using herbs that target  
77 particular Meridians.

| Meridian name                                   | Quality of Yin or Yang | Main organ      | Example Herb              |
|-------------------------------------------------|------------------------|-----------------|---------------------------|
| Taiyin <b>Lung</b> Channel of Hand              | Greater Yin (taiyin)   | Lung            | Rhizoma Pinelliae         |
| Shaoyin <b>Heart</b> Channel of Hand            | Lesser Yin (shaoyin)   | Heart           | Salvia miltiorrhiza       |
| Jueyin <b>Cardiovascular</b> Channel of Hand    | Faint Yin (jueyin)     | Cardiovascular  | Motherwort Herb           |
| Hand's Minor Yang <b>Three End</b>              | Lesser Yang (shaoyang) | Three End       | Cape jasmine fruit        |
| Taiyang <b>Small Intestine</b> Channel of Hand  | Greater Yang (taiyang) | Small Intestine | Adzuki Bean               |
| Yangming <b>Large Intestine</b> Channel of Hand | Yang Bright (yangming) | Large Intestine | Radix et rhizoma rhei     |
| Taiyin <b>Spleen</b> Channel of Foot            | Greater Yin (taiyin)   | Spleen          | Pueraria Root             |
| Shaoyin <b>Kidney</b> Channel of Foot           | Lesser Yin (shaoyin)   | Kidney          | Radix Angelicae Biseratae |
| Jueyin <b>Liver</b> Channel of Foot             | Faint Yin (jueyin)     | Liver           | Bupleurum chinense DC     |
| Shaoyang <b>Gallbladder</b>                     | Lesser Yang (shaoyang) | Gall Bladder    | Spica Prunellae           |
| Taiyang <b>Bladder</b> Channel of Foot          | Greater Yang (taiyang) | Urinary bladder | Common Andrographis Herb  |
| Yangming <b>Stomach</b> Channel of Foot         | Yang Bright (yangming) | Stomach         | Rhizoma Cyperi            |

78

79

80 While the anatomical and physiological evidence of Meridians are yet to be determined,  
81 the narrative of TCM allows for the classification of herb formulas based on their targeting  
82 Meridians [18-20]. The rationale of Meridian has been investigated for a few TCM herbs. For  
83 example, Jie Geng (*Platycodi Radix*) has been considered as a Lung Meridian herb, and it was  
84 discovered recently that an active ingredient in Jie Geng called saponin can affect the lung and  
85 respiratory systems by the inhibition of lipid peroxidation [21]. Another example is Danshen,  
86 the dried root of *Salvia miltiorrhiza burge*, which has been used for treating cardiovascular  
87 diseases and hepatitis as a Heart and Liver Meridian herb [22]. Recent studies have shown  
88 that its lipophilic ingredients such as tanshinones and hydrophilic ingredients such as  
89 salvianic acids may play a synergistic role to achieve its therapeutic efficacy [23]. With the  
90 increasing knowledge about the biochemical and pharmacological properties of the bioactive  
91 ingredients from the TCM herbs, it is now possible to carry out a larger-scale analysis to  
92 investigate the molecular basis of Meridians and other concepts in TCM [24].

93 To leverage the complex biochemical and pharmacological datasets, systems biology  
94 approaches involving machine learning techniques have been utilized to the study of herb

95 formulas [25]. For example, Fu *et al.* developed a data clustering method using a collection of  
96 2,012 compounds associated with TCM herbs and discovered that the hot or cold nature of the  
97 herbs can be correlated with the physicochemical and target pathways of their ingredient  
98 compounds [26]. Wang *et al.* collected 5,464 compounds for 115 herbs and applied an  
99 unsupervised clustering method called Self-organizing map (SOM) to establish a classifier of  
100 cold and hot herbs based on the chemical structural fingerprints of the compounds [27].  
101 However, these machine learning studies focused only on the hot/cold classification of TCM  
102 herbs, while it remains unknown whether the Meridian classification that involves 12 major  
103 classes can be also predicted from the chemical structure and physiochemical features of  
104 ingredient compounds.

105 In this study, we collected the Meridian information of herbs as well as the chemical  
106 structures of their ingredient compounds. These two datasets were utilized to determine the  
107 molecular features including structure-based fingerprints and ADME properties. With the  
108 feature matrices determined at both the herb level and the compound level, we further  
109 developed a machine learning framework to predict the Meridians of the herbs and their  
110 ingredient compounds. We tested multiple machine learning methods and showed that the  
111 classification of Meridians can be predicted especially at the compound level. These results  
112 suggested that Meridians indeed are associated with the molecular properties of herb  
113 compounds. We expected that our data integration approach may represent a novel  
114 perspective for the understanding of Meridian, which may ultimately lead to a more  
115 systematic exploration of the mechanisms of TCM.

## 116 **2. Materials and Methods**

117 The entire workflow of the present study was illustrated in **Fig 1**. First, herbs and their  
118 ingredient compounds were extracted from public databases. Molecular fingerprints and  
119 ADME properties were determined based on the chemical structures of the ingredient

120 compounds, and were used to construct an Herb-feature matrix and a Compound-Meridian  
 121 matrix. After obtaining all the features and Meridian classification for the herbs and the  
 122 compounds, the prediction of Meridians at the herb and compound levels was implemented  
 123 using four machine learning methods, including Support vector machine (SVM) [28], Decision  
 124 tree (DT) [29], Random forests (RF) [30, 31] and K-nearest neighbor (kNN) [32]. The  
 125 predication performance was further evaluated by cross-validation, based on which we  
 126 identified the best models and feature types to predict the Meridians. The most predictive  
 127 fingerprint features and ADME properties were identified for each Meridian separately.

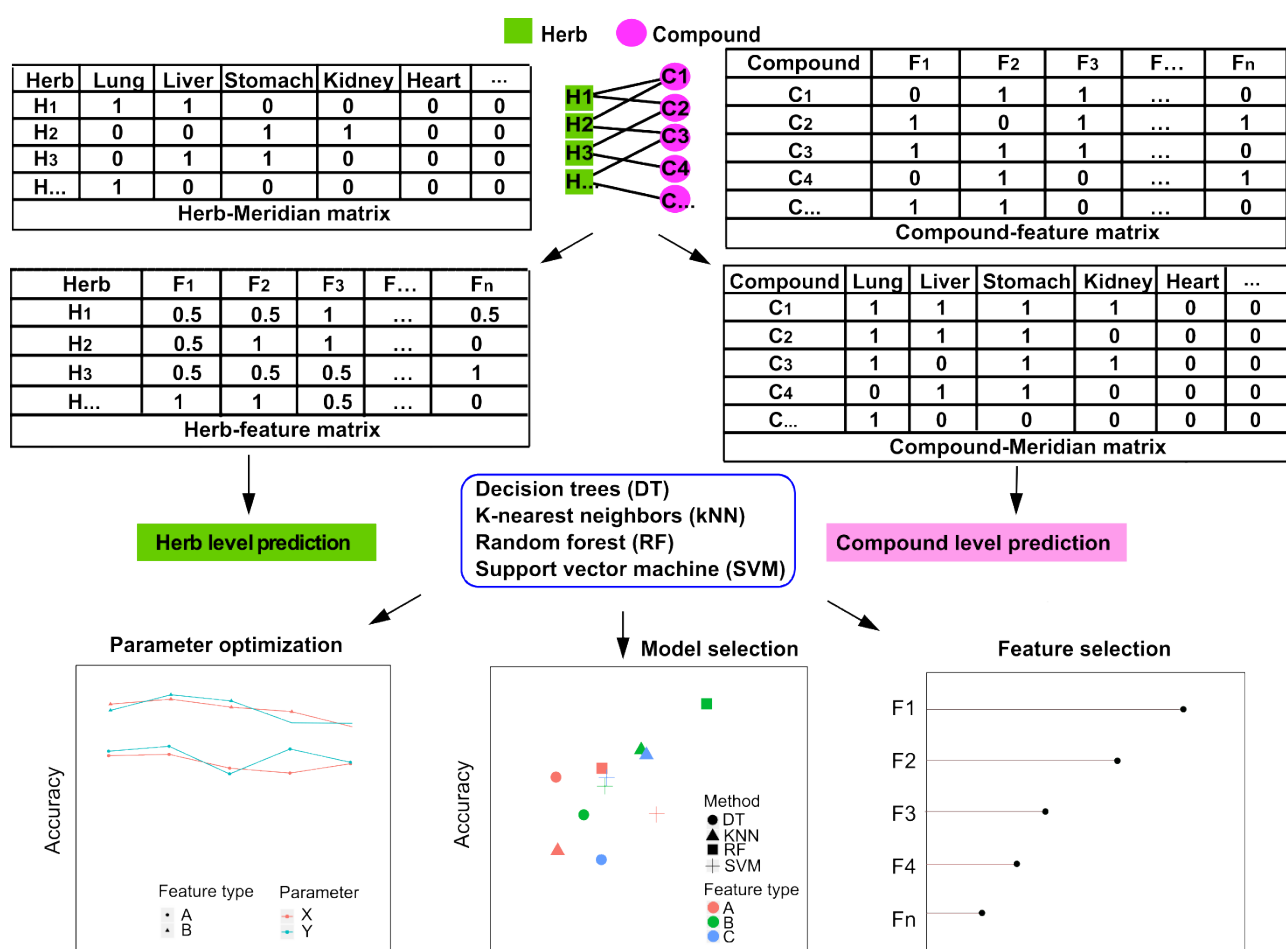

128  
 129 **Fig 1.** Workflow of the study. Herb-compound network shows the associations between herbs  
 130 (green rectangles) and their active compounds (purple circles), which were used to determine  
 131 the Herb-Feature and the Compound-Meridian matrices from the Herb-Meridian and

132 Compound-Feature matrices. Machine learning methods are utilized to predict the Meridian  
133 classes for herbs and compounds respectively, by parameter optimization, model selection  
134 and feature selection.

135

## 136 **2.1 Data collection**

### 137 **Meridian and ingredient compound information for TCM herbs**

138 We extracted the information of TCM herbs including the Meridian and the chemical  
139 components from the newly published database called TCMID [33], which is the largest  
140 database of TCM with over 49,000 prescriptions including 8,159 herbs and 25,210  
141 ingredients. However, not all the herbs were included in our data analysis. As the aim of the  
142 study was to predict the Meridians based on the structural fingerprints of the herb  
143 ingredients, we focused on the herbs with known Meridian information from TCMID.  
144 Furthermore, for each herb we included only those ingredient compounds with known  
145 SMILES information, such that their structural fingerprints and ADME properties can be  
146 determined. The herbs with missing Meridian as well as missing chemical structure  
147 information of their ingredient compounds were discarded in this study. The curated dataset  
148 contained 18,140 herb-compound pairs including 646 herbs and 10,053 ingredient  
149 compounds.

### 150 **Chemical structural fingerprints for the ingredient compounds**

151 The canonical SMILES representations for the compound structures were determined using  
152 Open Babel [34]. We used the PaDEL-Descriptor software [35] to encode SMILES into a list of  
153 binary fingerprint features that indicate whether a particular substructure is present or  
154 absent in the compound. We considered four common fingerprint types including PubChem



155 [36], MACCS (Molecular ACCess System) [37], Substructure (Sub) [38] and Extended  
156 fingerprint (Ext) [39]. PubChem fingerprint was extracted from the PubChem database (n =  
157 881 bits) while MACCS fingerprint was originated from the cheminformatics system provided  
158 by the MDL company (n = 166 bits). Substructure fingerprint was used to represent the  
159 specific substructures based on SMARTS Patterns for Functional Group Classification (n = 307  
160 bits) [38]·[40]. Extended fingerprint complements the Substructure fingerprint with  
161 additional bits describing circular topological features (n = 1024).

### 162 **ADME properties for the ingredient compounds**

163 ADME properties play important roles to determine the pharmacokinetics of a compound,  
164 constituting the key factors that determine the hit and lead optimization processes in drug  
165 discovery. ADME properties describe how a compound deposits inside the human body in  
166 terms of the processes of absorption, distribution, metabolism and excretion. For instance,  
167 water solubility, usually measured as the decimal logarithm of solubility (log S) in the units of  
168 mol/l or mg/ml, indicates the maximum dissolvable concentration of a compound in water.  
169 After oral administration, a drug reaches the initial portion of the gastrointestinal tract, where  
170 the level of gastrointestinal absorption affects the fraction of the drug dose that enters the  
171 bloodstream. Lipophilicity, on the other hand, represents the affinity of a compound in a  
172 lipophilic environment and thus determines how easily the compound can pass through the  
173 lipid membrane of cells. For the TCM herbs, the ADME properties for their ingredient  
174 compounds have been largely uncharacterized. Therefore, we resorted to computational  
175 methods as an alternative, which have been shown previously to be able to reliably and  
176 efficiently determine ADME. For example, the Lipinski's Rule-of-five has been long used for  
177 evaluating the bioavailability based on the structure information of compounds [41]. Classical  
178 QSAR (Quantitative Structure-Activity Relationship) approaches also rely heavily on

179 computational prediction of bioactivity properties based on the compound structures [35].  
180 We determined the ADME properties of the ingredient compounds using an online tool  
181 SwissADME [42]. In the original publication, the authors of SwissADME showed that the  
182 prediction of Lipophilicity achieved an accuracy of  $r$  (correlation) = 0.72, MAE (Mean absolute  
183 error) = 0.89 and RMSE (root mean square error) = 1.14 against experimental data for 11,993  
184 compounds. SwissADME also showed superior performance on the water solubility prediction  
185 with  $R^2$  (coefficient of determination) of 0.75, 0.69 and 0.81 based on three different models  
186 including the FILTER-IT model [42], the ESOL model [43] and the Ali model [44]. Notably,  
187 SwissADME has been recently applied to the study of plant-derived compounds including  
188 anticancer polyphenols from *Syzygium alternifolium* [45], PTPN1 (protein tyrosine  
189 phosphatase non-receptor type 1) inhibitors from several plant extracts [46] and a TCM called  
190 Zhi-zhu Wan [47]. Therefore, we considered the use of SwissADME as a reliable method to  
191 probe the ADME properties for TCM herb compounds. The SMILES of each compound was  
192 loaded as input to SwissADME, and the result consisted of 36 ADME features including 6 drug  
193 likeness features, 5 lipophilicity features, 4 medicinal chemistry features, 9 pharmacokinetics  
194 features, 9 physicochemical properties and 3 water solubility properties (**Supplementary**  
195 **Table S1**).

## 196 **2.2 Construction of Compound-feature matrix and Herb-feature matrix**

197 In this study, the features of a compound were considered as the combination of its  
198 fingerprint and ADME features, including 2378 fingerprint features (1024 Ext bits, 881  
199 PubChem bits, 307 Sub bits and 166 MACCS bits) and 36 ADME property features. The four  
200 fingerprint types (Ext, PubChem, Sub and MACCS) were first evaluated separately in the  
201 machine learning models to determine the best fingerprint type. Then, we combined this best  
202 fingerprint type with the ADME features to check whether model performance can be further

203 improved. The resulting Compound-feature matrix  $X_C$  contained 10,053 rows of compounds  
204 and 2,414 columns of features.

205 Based on a previous study, a drug combination's molecular features can be represented  
206 by merging the features of its component drugs [48]. We considered also an herb as a mixture  
207 of different ingredient compounds, and determined the herb features as below:

208 Let  $C_j = (c_1, c_2, \dots, c_k)$  denote the set of ingredient compounds for herb  $j$ , where  $k$  is the  
209 number of compounds. For each compound, its compound feature vector is denoted as  
210  $F_{\text{compound}} = (f_1, f_2, \dots, f_n)$ , where  $n$  is the number of features. We modelled the herb feature  
211  $F_{\text{herb}} = (g_1, g_2, \dots, g_n)$  as the average of its compound features, *i.e.*

$$212 \quad g_i, i = 1, \dots, n = \frac{\sum_{c_1, c_2, \dots, c_k} f_i}{k} \quad (1)$$

213 As described in section 2.1, we collected 646 herbs and determined 2414 features  
214 including 2378 fingerprints and 36 ADME properties for their ingredient compounds. The  
215 Herb-feature matrix (HF) thus was size of 646x2414:

$$216 \quad \mathbf{HF} = \begin{matrix} F_1 \\ F_2 \\ F_3 \\ F_4 \\ \dots \end{matrix} \begin{bmatrix} 0.2 & 0.1 & 0.3 & 0 & 0 \\ 0 & 0.1 & 0.1 & 0 & 0.8 \\ 0.1 & 0.6 & 0 & 0.1 & 1 \\ 0.5 & 0 & 0.1 & 0.3 & 0.1 \\ 0 & 0.4 & 0.2 & 0 & 0 \end{bmatrix} \quad 646 \times 2414$$

217 Furthermore, to evaluate whether filtering out the compounds with poor ADME  
218 properties affects the model prediction, we removed compounds that were predicted with  
219 logS lower than -6 by all the three water solubility models (the FILTER-IT model [42], the  
220 ESOL model [43] and the Ali model [44]) as well as low gastrointestinal absorption below  
221 30%, which was a commonly accepted threshold to separate well-absorbed from poorly-  
222 absorbed compounds. After the filtering, 583 herbs and 4922 compounds were retained. We  
223 compared the model prediction accuracies before and after the ADME filtering.

## 224 2.3 Construction of Herb-Meridian matrix and Compound-Meridian matrix

225 TCM herbs can be assigned to one or more of the 12 Meridians as shown in **Table 1**. For each  
 226 herb, its Meridian vector is denoted as  $\mathbf{M}_{\text{herb}} = (m_1, m_2, \dots, m_{12})$ . From the 646 herbs that we  
 227 collected from TCMID, the Meridian classification for the herbs was represented as a binary  
 228 Herb-Meridian matrix (HM) for the 12 Meridians as below:

$$229 \quad \mathbf{HM} = \begin{matrix} & \text{Lung} & \text{Spleen} & \text{Stomach} & \text{Kidney} & \dots \\ \begin{matrix} M_1 \\ M_2 \\ M_3 \\ M_4 \\ \dots \end{matrix} & \begin{bmatrix} 1 & 1 & 0 & 0 & 0 \\ 0 & 1 & 1 & 0 & 0 \\ 1 & 0 & 0 & 1 & 1 \\ 0 & 0 & 1 & 0 & 1 \\ 0 & 0 & 1 & 0 & 0 \end{bmatrix} \end{matrix} \quad 646 \times 12$$

230 We denoted that  $\mathbf{H}_j = (h_1, h_2, \dots, h_p)$  is a set of  $p$  herbs that contain the compound  $j$ . The  
 231 Meridian vector for this compound  $\mathbf{M}_{\text{compound}} = (l_1, l_2, \dots, l_{12})$  was determined as the union of  
 232 the Meridians of the herbs in  $\mathbf{H}_j$ , *i.e.*

$$233 \quad l_{i, i=1, \dots, 12} = I(\sum_{h_1, h_2, \dots, h_p} m_i > 0), \quad (2)$$

234 where  $I(\cdot)$  is an indicator function. The full Compound-Meridian (CM) matrix was  
 235 constructed accordingly for the 10,053 compounds on the 12 Meridians:

$$236 \quad \mathbf{CM} = \begin{matrix} & \text{Lung} & \text{Spleen} & \text{Stomach} & \text{Kidney} & \dots \\ \begin{matrix} C_1 \\ C_2 \\ C_3 \\ C_4 \\ \dots \end{matrix} & \begin{bmatrix} 1 & 1 & 0 & 0 & 1 \\ 0 & 1 & 1 & 1 & 1 \\ 1 & 0 & 0 & 1 & 1 \\ 1 & 0 & 1 & 0 & 1 \\ 0 & 0 & 1 & 1 & 0 \end{bmatrix} \end{matrix} \quad 10053 \times 12$$

237

## 238 2.4 Training the machine learning models

239 We set up the machine learning framework for each Meridian with binary response variables.  
 240 Four supervised classification methods including SVM, DT, RF and kNN [49] were employed to  
 241 predict the Meridians. These methods were implemented using the R package caret [50]. SVM

242 is an algorithm which can determine a hyper plane to maximize the separation between the  
243 classes with minimal error. DT constructs a decision tree by representing an observation as a  
244 branch node and its classification result by a leaf node. kNN is a distance-based learning  
245 algorithm where an object is classified according to a majority vote of its neighbors. RF is a  
246 decision tree-based ensemble learning approach where each tree votes for its preferred  
247 classification and the majority vote classification returns as the final prediction. We used five-  
248 fold cross validation to avoid overfitting when evaluating the model performance. Initially the  
249 data was split randomly to the training (70%) and testing (30%) sets. A five-fold cross-  
250 validation was applied to split the training data randomly into five equally sized folds. At each  
251 iteration, one unique fold was hold out while the remaining four folds were used to train a  
252 machine learning model. The model performance was then evaluated on the hold-out fold.  
253 Such a process was repeated five times, after which the model that produced the highest  
254 accuracy was selected as the best model to predict the testing set, which comprise 30% of the  
255 total data. The model performance on the independent testing set was reported. The R scripts  
256 and input data for the machine learning framework are publically accessible at  
257 <https://github.com/herb-medicne/meridian-prediction>.

## 258 **2.5 Evaluating the prediction accuracy**

259 We obtained a confusion matrix to evaluate the prediction accuracy for the test data. The  
260 overall prediction accuracy was determined using the following equations:

$$261 \text{ overall accuracy} = \frac{TP + TN}{TP + FP + FN + TN} \quad (3)$$

262 True positive (TP) is the number of positive samples (*i.e.* herbs or compounds) which are  
263 correctly identified for a given Meridian. False positive (FP) is the number of positive samples  
264 which are not correctly identified. True negative (TN) is the number of negative samples  
265 which are correctly identified and false negative (FN) is the number of negative samples

266 which are not correctly identified. To avoid the inflated overall accuracy for imbalanced data,  
267 balanced accuracy was also used to evaluate the performance of models, which is the average  
268 of sensitivity and specificity:

$$269 \quad \text{balanced accuracy} = \frac{\frac{TP}{TP+FN} + \frac{TN}{FP+TN}}{2} \quad (4)$$

270 Furthermore, Matthews correlation coefficient (MCC) was also utilized for the model  
271 evaluation:

$$272 \quad \text{MCC} = \frac{TP \times TN - FP \times FN}{\sqrt{(TP + FP)(TP + FN)(TN + FP)(TN + FN)}} \quad (5)$$

## 273 **2.6 Identification of key features for the prediction of Meridians at the compound level**

274 To find the most important features which play important roles for the Meridian  
275 classification, we used the varImp package [51] to estimate the variable importance based on  
276 the best models. Furthermore, the SARpy [52] tool was employed to detect key substructures  
277 (fragments) that emerge the most frequently as important features when predicting a specific  
278 Meridian. SARpy evaluates the significance of each substructure based on the likelihood ratio:

$$279 \quad \text{likelihood ratio} = \frac{TP/FP}{P/N} \quad (6)$$

280 , where TP and FP stand for the number of compounds which contain the substructure  
281 and belong, or do not belong to the Meridian, respectively. We selected the top ten  
282 important substructures ranked by the likelihood ratio score for each Meridian. These  
283 substructures can be therefore considered as the most frequent fragments among the  
284 compounds of a specific Meridian.

285

## 286 **3. Results**

### 287 **3.1 Distribution of Meridians at the herb level and the compound level**

288 In total, 646 herbs including 10,053 ingredient components with Meridian and chemical  
289 structure information were obtained from the TCMID database (**Supplementary Table S2**).  
290 The Meridian distribution at the herb and the compound levels can be seen in **Fig 2**. At the  
291 herb level, altogether 333 herbs target the Liver Meridian, followed by Lung (n = 237),  
292 Stomach (n = 235), Spleen (n = 213), Kidney (n = 181), Heart (n = 155) and Large Intestine (n  
293 = 111) (**Fig 2A**). In contrast, much less herbs are found for the other five Meridians including  
294 Bladder (n = 57), Gallbladder (n = 33), Small Intestine (n = 24), Cardiovascular (n = 4) and  
295 Three End (n = 4). Next, we focused on the top seven abundant Meridians including Liver,  
296 Lung, Spleen, Stomach, Kidney, Heart and Large Intestine.

297

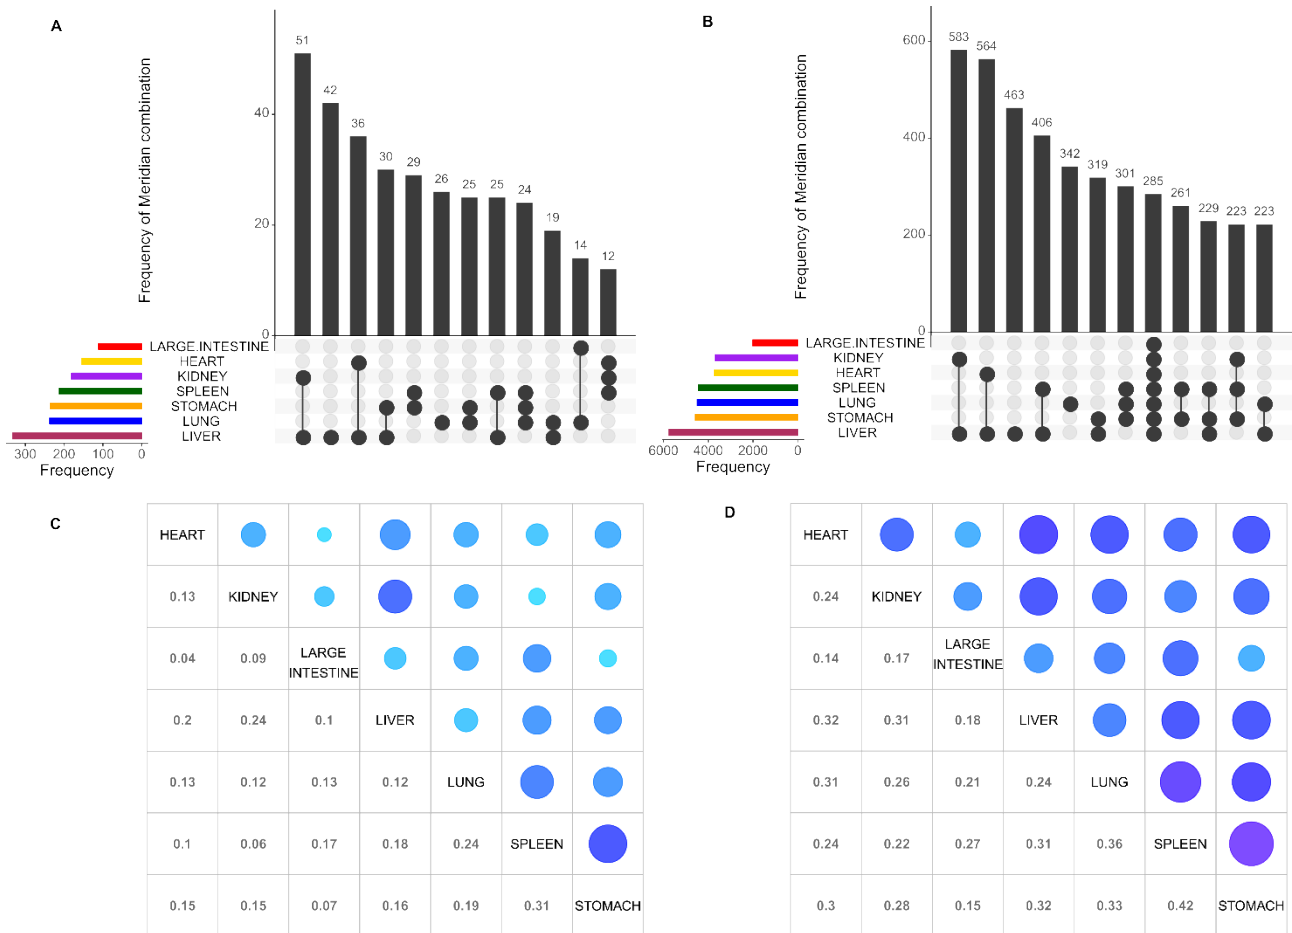

298

299 **Fig 2.** Herb-Meridian and Compound-Meridian distributions. (A-B) The color bars at the  
 300 bottom left represent the frequency of herbs or compounds for each of the seven major  
 301 Meridians, which can be further collapsed into subclasses depending on whether an herb or a  
 302 compound is shared by one or several Meridians. The vertical bars show the frequency of  
 303 herbs or compounds for a particular subclass of Meridian combination, as indicated by the  
 304 connected lines below the x-axis between the Meridians. (C-D) The Jaccard coefficients  
 305 between the Meridian pairs at the herb and the compound levels. The size of blue circles on  
 306 the upper diagonal shows the degree of the similarity.

307

308 As expected, the majority of herbs (n = 580; 89.8%) target more than one Meridian,  
 309 however, there is a varying degree of overlap between them. It can be seen that Kidney and



310 Liver has the biggest number of shared herbs ( $n = 51$ ), followed by 36 herbs that are common  
311 between Liver and Heart, and then 30 herbs between Liver and Stomach. The overlap  
312 between the Meridians illustrates the multi-target characteristics of TCM herbs. For example,  
313 Huo Xiang (*Agastache rugose*) belongs to Lung, Spleen and Stomach simultaneously [53], as  
314 this herb is known to relieve the symptoms of Lung, Spleen and Stomach diseases [54]. On the  
315 other hand, there are relatively fewer herbs that target only one Meridian. For example, 42 of  
316 the 384 (11%) Liver herbs are classified exclusively as Liver herbs and 26 of all the 260  
317 (10%) Lung herbs do not target other Meridians. In contrast, all the herbs that belong to  
318 Stomach, Spleen and Large Intestine also target other Meridians. At the compound level,  
319 similar patterns was observed, where the Liver Stomach and Lung are again the top abundant  
320 Meridians (**Fig 2B**).

321 In order to quantify the overall similarity between these seven major Meridians, we  
322 calculated the Jaccard coefficients using the R package 'Corrplot' [55, 56]. The Jaccard  
323 coefficient, also known as Jaccard index, is a measure of overlap between two sets, with a  
324 value of zero for complete non-overlap while a value of one for identical sets [57, 58]. As  
325 shown in **Fig 2C-D**, the Jaccard coefficients between the Meridians are generally low, with the  
326 lowest score found between Heart and Large Intestine (0.04 at the herb level and 0.14 at the  
327 compound level), and the highest score found between Spleen and Stomach (0.31 at the herb  
328 level and 0.42 at the compound level). The average pairwise Jaccard coefficients are 0.15 and  
329 0.26 for the herb level and for the compound level respectively, indicating that there are weak  
330 correlations between Meridians in term of the herb and compound distributions. Therefore,  
331 we considered the prediction of each Meridian separately in the following machine learning  
332 tasks. Ultimately, for a given new herb or a compound, its Meridians can be predicted using  
333 the best machine learning models.

### 334 **3.2 Prediction accuracy of Meridians using machine learning approaches**

335 We carried out the prediction of Meridians at two data levels including herb level and  
336 compound level, for which their features were determined based on structure-based  
337 fingerprints and ADME properties. At the herb level, the ADME properties were also utilized  
338 to filter out those compounds with low water solubility or low gastrointestinal absorption  
339 (see section 2.2 for more details). As a result, only 583 herbs remained after the filtering,  
340 covering 4,922 compounds. We evaluated the prediction performance under scenarios of  
341 different machine learning methods, feature types and data levels. More specifically, for each  
342 one of the seven Meridians, 84 machine learning-based models were constructed including all  
343 possible combinations from the four machine learning methods (SVM, DT, RF and kNN), seven  
344 feature configurations (Ext, PubChem, Sub, MACCS, ADME, Ext + ADME and All fingerprints +  
345 ADME) and three data levels (compound level, herb levels with or without ADME filtering).  
346 The model was trained by a five-fold cross validation using 70% data and then tested for its  
347 prediction accuracy using the remaining 30% data (see section 2.4 for more details). To  
348 benchmark the model performance for each Meridian, we permuted the Meridian labels  
349 while keeping the ratio of positive and negative cases unchanged. The model performance for  
350 the permuted data was considered as the baseline.

351 As shown in **Fig 3A**, Large Intestine has the highest overall prediction accuracy among  
352 all the seven Meridians ( $p$ -value < 0.0001, Wilcoxon rank-sum test), with the median average  
353 accuracy reaching 0.83. Model performance for predicting Heart Meridian (median average  
354 accuracy at 0.72) became the second best, followed by Kidney (median average accuracy at  
355 0.68). The enhanced overall accuracy for Large Intestine, Heart and Kidney is mainly due to  
356 the fewer positive cases at both herb and compound levels (**Fig 2A-B**). Note that we pooled all  
357 the 84 machine learning models that differ in their feature combinations and machine  
358 learning methods, some of which were sub-optimal and therefore led to poorer prediction

359 results. Still, these machine learning models performed significantly better than the baseline  
 360 prediction of permuted models (Fig S1, p-value < 0.0001, Wilcoxon rank-sum test). These  
 361 results supported the general feasibility of using machine learning approaches to relate  
 362 chemical information of herbs and compounds to explain Meridians (**Supplementary Table**  
 363 **S3**).  
 364

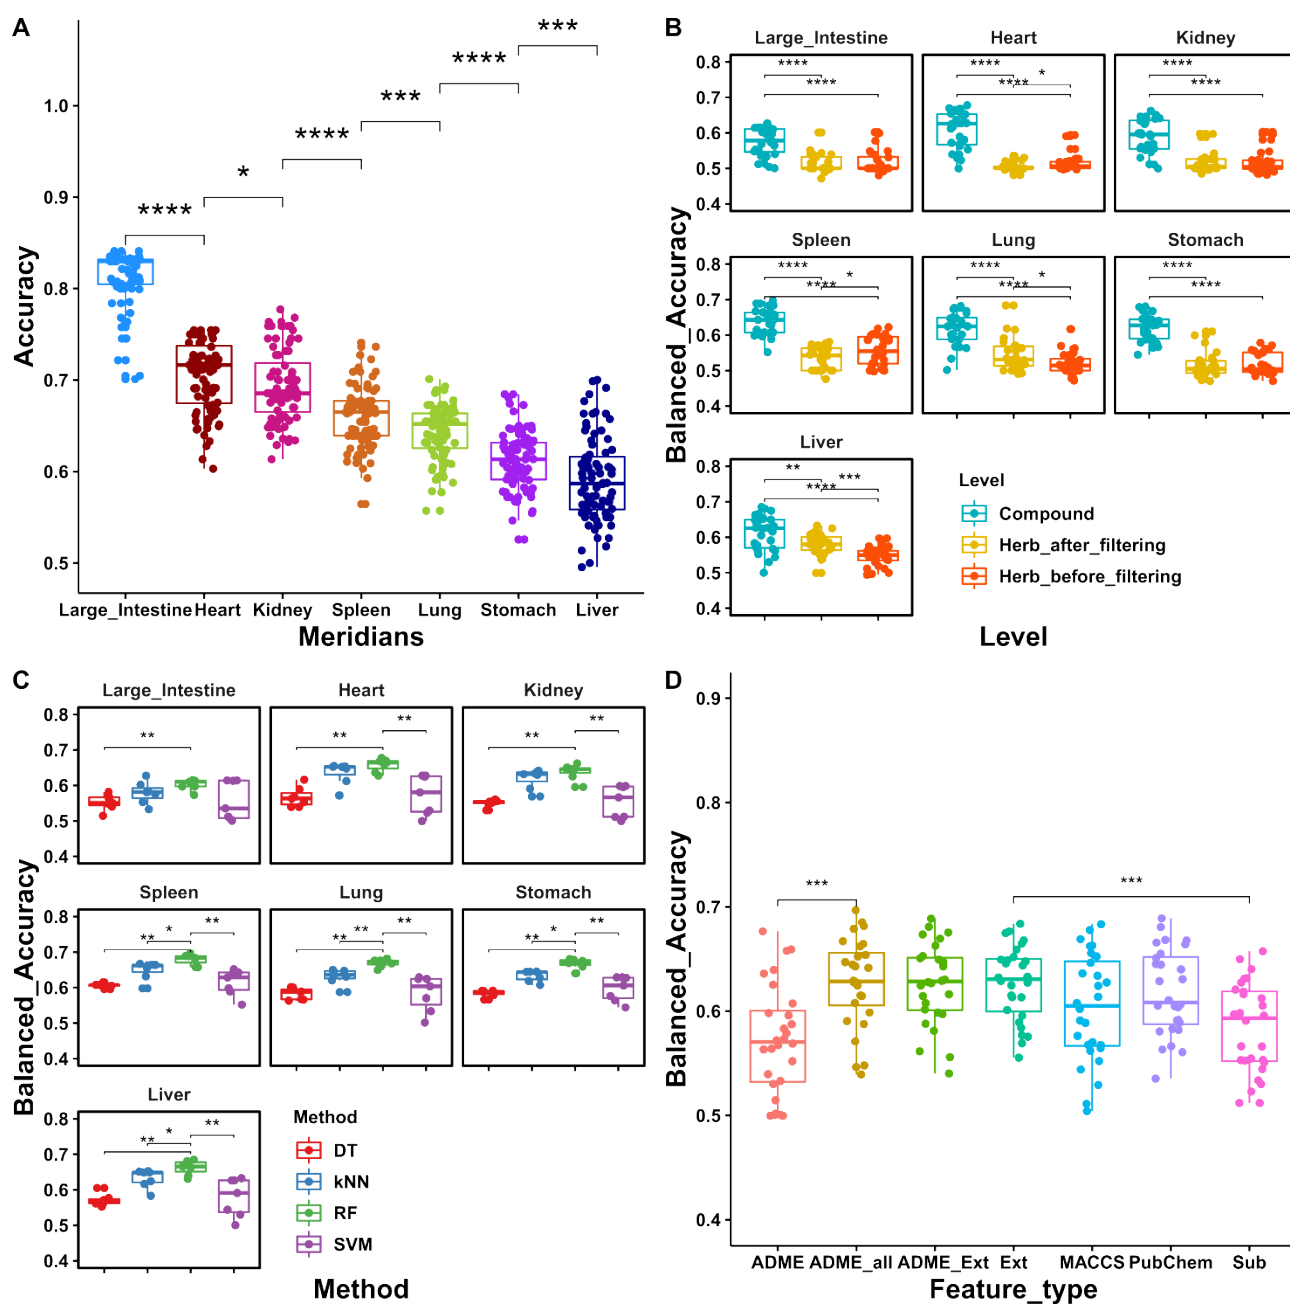

365

366

367 **Fig 3.** Evaluation of the machine learning model predictions. (A) The overall accuracy for the  
368 seven Meridians (B) The balanced accuracy at the three data levels (compound-level, herb-  
369 level before and after ADME filtering). (C) The balanced accuracy for the four machine  
370 learning methods at the compound level. (D) The balanced accuracy for the ADME and  
371 fingerprint feature types at the compound level. Wilcox rank sum test. ns:  $p \geq 0.05$ ; \*:  $p <$   
372  $0.05$ ; \*\*:  $p < 0.01$ ; \*\*\*:  $p < 0.001$ ; \*\*\*\*:  $p < 0.0001$

373

374 Furthermore, using the Balanced Accuracy metric, we found that the compound-level  
375 prediction performed significantly better than the herb-level predictions (**Fig 3B**,  $p$ -value  $<$   
376  $0.001$ , Wilcoxon rank-sum test). At the herb level, filtering out compounds with poor ADME  
377 properties improved the prediction significantly in Heart, Lung and Stomach ( $p$ -value  $< 0.05$ ,  
378 Wilcoxon rank-sum test), while for Kidney and Spleen only the top machine learning models  
379 achieved higher prediction accuracy. In contrast, the ADME filtering seemed not helping the  
380 prediction of Large Intestine and Liver Meridians. In order to determine the chemical  
381 fingerprint features for an herb, we took the average of its compound features, based on the  
382 assumption that all the ingredient compounds are equally contributing to the pharmacology  
383 of the herb. This was likely an oversimplification of the actual mechanisms of action for a  
384 majority of herbs. However, the biological roles about the ingredient compounds were largely  
385 missing from TCMID and other resources, suggesting that the actual contributions of these  
386 ingredient compounds have not been thoroughly resolved. In contrast, the compound-level  
387 data was more reliable, as each compound was treated independently when determining its  
388 molecular features and Meridians. This may explain the superior performance of compound-  
389 level predictions compared to the herb-level predictions. We anticipated that the herb-level  
390 prediction may be further improved when the actual composition and bioactivity of the

391 compounds can be determined using modern high-throughput techniques e.g. mass  
392 spectrometry or HPLC (High performance liquid chromatography) [59].

393 As the compound-level prediction showed better performance than the herb-level  
394 prediction, we further compared the prediction accuracy between different machine learning  
395 methods at the compound level. As shown in **Fig 3C**, top models of RF performed better than  
396 kNN, DT and SVM across all the seven Meridians, suggesting that RF was able to detect the  
397 predictive features due to the use of ensemble learning technique. We also evaluated the  
398 prediction accuracy of the machine learning methods using different feature types. As shown  
399 in **Fig 3D**, models with the Ext fingerprint performed better than the other feature types (p-  
400 value <0.05, Wilcoxon rank-sum test). This result was expected as the Ext fingerprint contains  
401 1024 bits which are the longest among all the four fingerprint types. Furthermore, models  
402 using all the fingerprint types combined with ADME achieved higher top accuracies,  
403 compared to the use of them individually (**Fig 3D**). Taken together, we concluded that the  
404 combination of all fingerprints with ADME features may carry the most comprehensive  
405 information to predict the Meridians at the compound level, for which the RF method  
406 achieved the best prediction accuracy compared to other machine learning methods (**Table**  
407 **2**).

408

409 **Table 2. The overall prediction accuracy that was achieved for each Meridian at the**  
410 **compound level by Random Forest using all the available features.**

| Meridian        | Feature                | Method | Accuracy |
|-----------------|------------------------|--------|----------|
| Heart           | ADME + All fingerprint | RF     | 0.70     |
| Kidney          | ADME + All fingerprint | RF     | 0.70     |
| Large intestine | ADME + All fingerprint | RF     | 0.81     |

|         |                        |    |      |
|---------|------------------------|----|------|
| Liver   | ADME + All fingerprint | RF | 0.67 |
| Lung    | ADME + All fingerprint | RF | 0.65 |
| Spleen  | ADME + All fingerprint | RF | 0.67 |
| Stomach | ADME + All fingerprint | RF | 0.65 |

411

412 **3.3 Important fingerprint and ADME features to explain Meridian at the compound**  
413 **level**

414 After determining RF as the best model, we determined the feature importance score  
415 according to its contribution to the change of model prediction accuracy at the compound  
416 level: if the removal of a feature resulted in a much worse prediction by the model, then the  
417 feature will be given a higher importance score. We selected the top 30 most important  
418 features for each Meridian, resulting in 59 unique features in total, including 27 ADME  
419 properties and 32 fingerprints. We confirmed that the 59 important features were  
420 significantly more predictive than the other features across all the seven Meridians ( $p <$   
421  $0.0001$ , Wilcoxon rank-sum test), with the median importance score for these 59 top features  
422 ranging from 2.77 for Large Intestine to 6.4 for Spleen (**Fig 4A**).

423

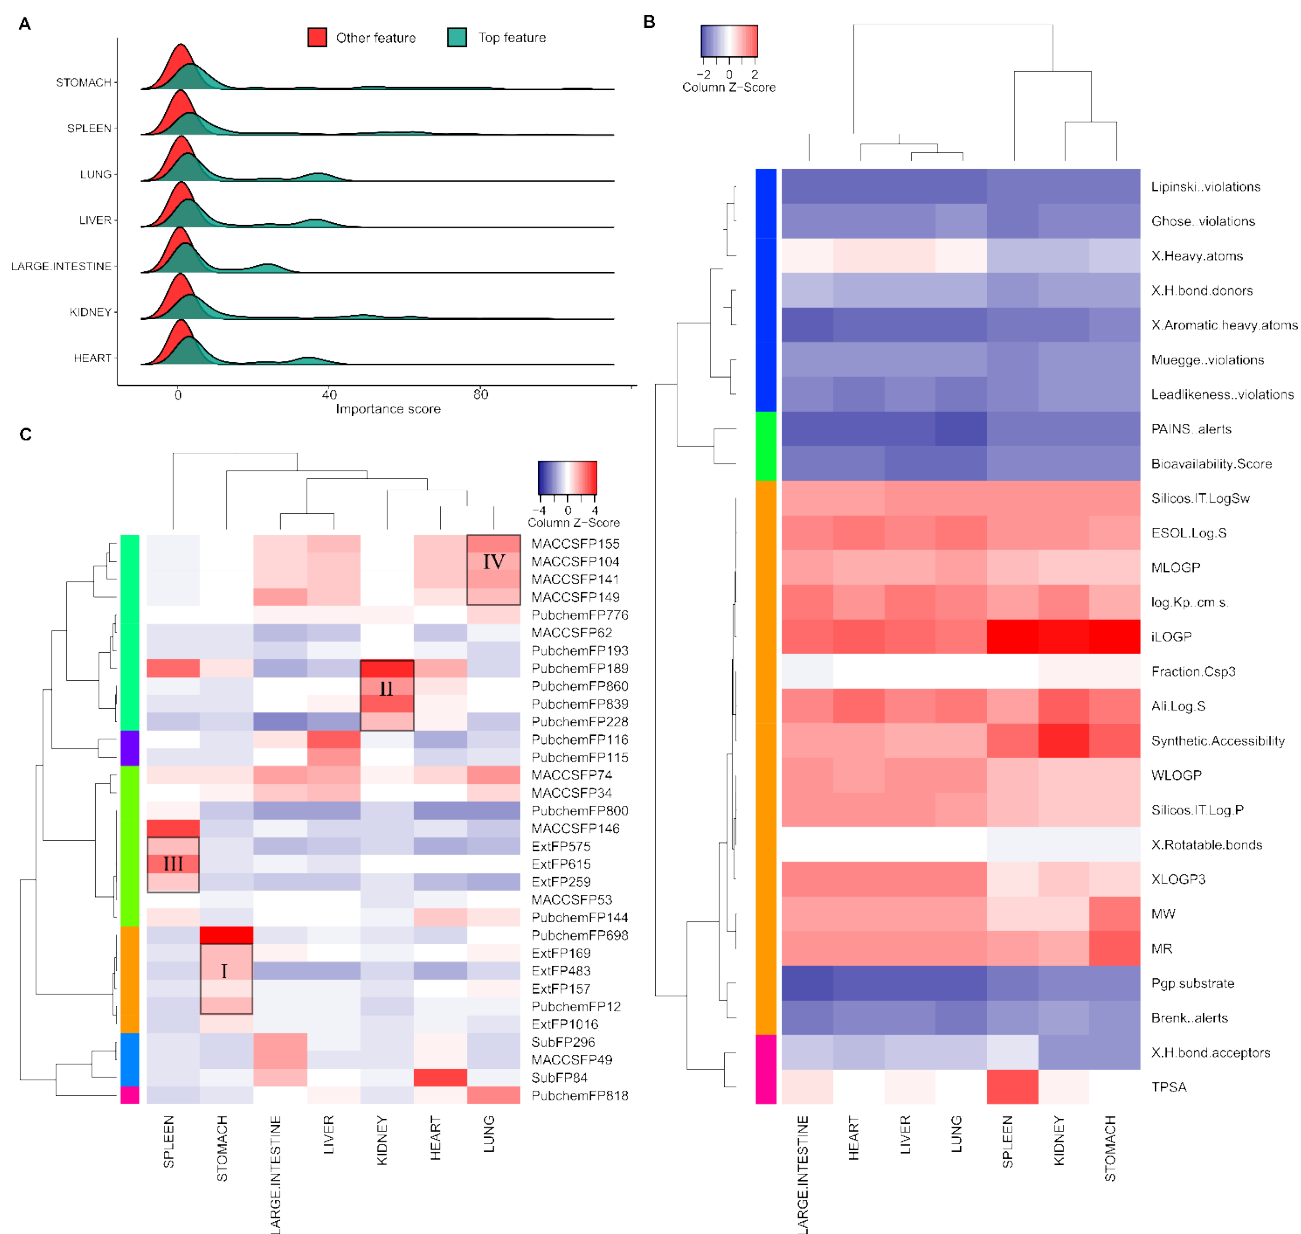

424

425 **Fig 4.** Important features determined at the compound-level prediction of Meridian. (A) The  
 426 distribution of importance scores for the top 59 features as compared to all features. (B-C)  
 427 The bi-clustering of the importance scores for the 27 ADME features and 32 fingerprints.

428

429 To evaluate the top features across the Meridians, we generated the bi-clustering  
 430 heatmaps for the top ADME and fingerprint features separately. As shown in **Fig 4B**,  
 431 lipophilicity features including iLOGP, WLOGP, MLOGP are among the top ADME features  
 432 across all the seven Meridians, with the mean Z-score of feature importance of 1.66, 0.74 and

433 0.67, separately. This suggested that lipophilicity plays important roles for the Meridian  
434 classification of compounds. Molar refractivity (MR), a measure of the total polarizability of a  
435 substance, was identified as another important feature (mean Z-score 0.96). In addition,  
436 Solubility features predicted by the multiple methods using SwissADME have also shown  
437 relatively higher importance, with mean Z-scores ranging from 0.92 to 1.14. Lipophilicity is  
438 known to affect pharmacokinetic properties and the overall suitability of drug candidates[60].  
439 Molar refractivity and Solubility are known to play important roles for the absorption and  
440 subsequent bioavailability of a drug in vivo. Our results suggest the rationale of including the  
441 ADME evaluation for understanding the pharmacology and pharmacokinetics of ingredient  
442 compounds in herb medicine.

443 We also evaluated the importance scores of the chemical fingerprints. As shown in **Fig**  
444 **4C**, the fingerprint features from the same types tend to cluster together, with a Rand Index of  
445 0.66 when comparing the similarity between the clustering by cutting the hierarchical tree at  
446 1.5 and their actual feature types[61]. For example, the most important fingerprint features  
447 for Stomach Meridian formed a cluster (Cluster I in **Fig 4C**), which consisted of mainly Ext  
448 fingerprint features (Ext169, Ext483, Ext157 and Ext1016); The most important fingerprint  
449 features for Kidney are PubChem fingerprint features (PubChem228, PubChem189,  
450 PubChem839 and PubChem860) (Cluster II). Similar patterns were also found for Spleen  
451 (Cluster III as an Ext fingerprint dominant cluster) and for Lung (Cluster IV as a MACCS  
452 fingerprint dominant cluster). In general, the importance scores for the Ext fingerprints were  
453 higher among all the four fingerprint types (**Fig S2**), which is also consistent with the better  
454 machine learning performances of Ext fingerprints described earlier in section 3.2 (**Fig 3D**).

455 Finally, we determined the important substructure fragments based on the top  
456 fingerprints. As shown in **Supplementary Table S4**, the representative fragments for each  
457 Meridian are quite different from each other, which is in line with the limited overlap of herbs



458 between the Meridians (**Fig 2**). This result indicates that there might be enrichment of basic  
459 chemical structures that differs between Meridians, which can be further explored using  
460 pharmacophore modeling approaches [62].

#### 461 **4. Discussion**

462 Traditional Chinese Medicine (TCM) has gained increasing popularity in the drug discovery  
463 field, as shown by a few successful examples including the discovery of artemisinin for  
464 treating malaria and arsenic trioxide for treating acute promyelocytic leukemia [63].  
465 Currently, there are around 1000 clinical trials on TCM herb medicine registered in the  
466 Clinicaltrials.gov [64] (retrieved in January, 2019), suggesting that the therapeutic potential of  
467 TCM has been actively researched through more rigorous scientific investigation. While the  
468 TCM theory is largely self-consistent as a philosophical narrative, the scientific rationale of  
469 why and how it is working remains elusive. For example, the interpretation of five elements  
470 and qi is rather metaphysical than physical, which makes many of the TCM concepts difficult  
471 to be translated into modern physiological and medical entities [9]. Furthermore, TCMs  
472 usually involve many active compounds that modulate various biological targets, where little  
473 is known about how these interactions lead to therapeutic relevance under a specific disease  
474 context. With the development of molecular profiling technologies, the extraction and  
475 characterization of the herb constituents is now possible and is expected to provide a  
476 comprehensive source of pharmacology data. Therefore, there have been strong needs for  
477 data integration to deconvolute the mechanisms of action of herb medicine in relation to the  
478 disease biology, so that a formal framework for testing and understanding of TCM can be  
479 established [65].

480 In this study, we built a computational framework to study the concept of Meridians,  
481 which has been long established for the classification of TCM herbs and thus constitutes the  
482 fundamental basis of treatment strategy in TCM. We collected the Meridian information for

483 major TCM herbs and determined their features based on the chemical fingerprints and ADME  
484 properties. Using supervised classification methods including Random Forests, Support  
485 Vector Machines, Decision Trees and K-Nearest Neighbor algorithms, we showed that the  
486 Meridians can be accurately predicted especially at the compound level, with an average  
487 accuracy of 0.70 of all the Meridians (**Table 2**). Therefore, we concluded that molecular  
488 features of the compounds can be considered as the essential information for an herb to be  
489 classified as a particular Meridian. In particular, we showed that the ADME properties  
490 improved the prediction accuracy, suggesting the relevance and reliability of the in-silico  
491 predicted ADME properties for the understanding of Meridians. Ideally, experimentally-  
492 validated ADME properties for the ingredient compounds would be needed to confirm the  
493 prediction results. Furthermore, we considered 36 ADME features that were provided in  
494 SwissADME, assuming that TCM herb compounds become active when absorbed in the  
495 bloodstream. However, the therapeutic efficacy of herb medicine may be induced on gut  
496 microbiota, which do not necessarily interact with the bloodstream [66]. More relevant  
497 factors that may affect the ADME of herb medicine are expected to enhance the model  
498 prediction results. On the other hand, we evaluated four major structure-based fingerprint  
499 types, and found that the Extended Substructure fingerprints outperformed the other three  
500 fingerprint types. This may exemplify the advantage of including more bits in the fingerprint  
501 string, as such information may differentiate the complex structure and fragments more  
502 distinctively, especially when describing ring structures. In contrast, the MACCS\_FP contains  
503 only 166 bits which may be insufficient to capture predictive features for this challenging  
504 application.

505 We found that the compound-level prediction is in general more accurate than the herb-  
506 level prediction. There might be three reasons for that. Firstly, the exact compound  
507 composition for a given herb might not be accurate, as the extraction and detection of active

508 components from herb medicine remains a challenge [67]. Secondly, even though certain  
509 compounds can be detected from a given herb, they may not be absorbable due to their poor  
510 ADME properties. As a result, the features that were determined for these compounds may  
511 play no therapeutic roles and thus do not affect the Meridian of the herbs. Thirdly, although  
512 the same compounds can be found from different herbs, their actual abundance may differ. In  
513 our construction of binary herb-feature matrix, there is lack of information to differentiate the  
514 different levels of compound abundance. We expected the prediction accuracy at the herb  
515 level can be improved, providing that more accurate compound composition and activity data  
516 become available. In our modeling framework, the extraction of key features at the herb level  
517 can be done easily by first extracting the key features at the Compound level, and then  
518 combining them for a particular herb, using the Compound-Feature matrix and Herb-  
519 Compound matrix. With this framework, we may predict not only the Meridian for new herbs,  
520 but also for approved synthetic compounds for which their disease indications are already  
521 known. The link between Meridian and disease indications may provide more physiological  
522 understanding of Meridian.

523 We identified that Random Forest (RF) as the best classification method, corroborating  
524 the superior performance of RF in similar machine learning tasks [68]. As an Ensemble  
525 Learning method, RF averaged the predictions from multiple decision trees and thus lowered  
526 the risk of overfitting. In the future, more advanced machine learning methods such as Deep  
527 Learning may be worth trying [69]. To make sense of TCM, the ultimate objective is not only a  
528 predictive model but also an interpretable model that can help understand the underlying  
529 mechanisms of action. Here, we identified the predictive features that may provide initial  
530 evidence for the molecular basis of Meridians, which may facilitate the discovery of novel  
531 active compounds from TCM herbs. By further improving the knowledge of active ingredients  
532 for TCM herbs and the accuracy of machine learning algorithms, we expected that the

533 computational framework can be greatly expanded towards a more systematic understanding  
534 of Meridians.

535 TCMID is currently the largest database of TCM that collects over 49,000 prescriptions  
536 including 8,159 herbs and 25,210 ingredients. However, the majority of these herbs are lack  
537 of appropriate annotation on their Meridian information, highlighting the limited  
538 understanding of the topic. We extracted a subset of herbs from TCMID (n = 646) with known  
539 Meridian information and then included their ingredient compounds with known chemical  
540 structures (n = 10,053), with which the most predictive machine learning models and features  
541 were determined. To be able utilize our machine learning framework to predict the unknown  
542 Meridian for a given herb, the structural information of its ingredient compounds need to be  
543 provided as input data. With the structural information it is then possible to determine the  
544 fingerprint and ADME features. In the future, we envisage that more comprehensive  
545 structural information about the active ingredients in herbs can be determined, so that the  
546 Meridian annotation of herbs can be done more systematically and more accurately. The  
547 advanced machine learning approaches that are tailored for analyzing such complex datasets  
548 may hold the key to the understanding of TCM rationale, which may ultimately provide novel  
549 insights for drug discovery and disease treatment [62].

## 550 **Acknowledgements**

551 We thank the authors of the TCMID database for making the herb medicine annotation data  
552 fully accessible.

## 553 **References**

554 1. A Antolin A, Workman P, Mestres J, Al-Lazikani B. Polypharmacology in precision  
555 oncology: current applications and future prospects. *Curr Pharm Des.* 2016;22(46):6935-45.

- 556 2. Tschöp MH, Finan B, Clemmensen C, Gelfanov V, PerezTilve D, Müller TD, et al.  
557 Unimolecular polypharmacy for treatment of diabetes and obesity. *Cell Metab.* 2016;24(1):51-  
558 62.
- 559 3. Reddy AS, Zhang S. Polypharmacology: drug discovery for the future. *Expert Rev*  
560 *Clin Pharmacol.* 2013;6(1):41-7.
- 561 4. Li S, Zhang B, Jiang D, Wei Y, Zhang N. Herb network construction and co-module  
562 analysis for uncovering the combination rule of traditional Chinese herbal formulae. *BMC*  
563 *Bioinformatics.* 2010;11(11):S6.
- 564 5. Zhao X, Zheng X, Fan T, Li Z, Zhang Y, Zheng J. A novel drug discovery strategy  
565 inspired by traditional medicine philosophies. *Science.* 2015;347(6219):S38-S40.
- 566 6. Liang H, Ruan H, Ouyang Q, Lai L. Herb-target interaction network analysis helps  
567 to disclose molecular mechanism of traditional Chinese medicine. *Sci Rep.* 2016;6:36767.
- 568 7. Zhang C, Li L, Zhang G, Chen K, Lu A. Deciphering Potential Correlations between  
569 New Biomarkers and Pattern Classification in Chinese Medicine by Bioinformatics: Two  
570 Examples of Rheumatoid Arthritis. *Chin J Integr Med.* 2018. doi: [http://sci-](http://sci-hub.tw/10.1007/s11655-018-2571-8)  
571 [hub.tw/10.1007/s11655-018-2571-8](http://sci-hub.tw/10.1007/s11655-018-2571-8).
- 572 8. Chan K. Progress in traditional Chinese medicine. *Trends Pharmacol Sci.*  
573 1995;16(6):182-7.
- 574 9. Gu S, Pei J. Innovating Chinese Herbal Medicine: From Traditional Health Practice  
575 to Scientific Drug Discovery. *Front Pharmacol.* 2017;8:381.
- 576 10. Rezadoost H, Karimi M, Jafari M. Proteomics of hot-wet and cold-dry  
577 temperaments proposed in Iranian traditional medicine: a Network-based Study. *Sci Rep.*  
578 2016;6:30133.

- 579 11. Jafari M, Rezadoost H, Karimi M, Mirzaie M, Rezaie-Tavirani M, Khodabandeh M, et  
580 al. Proteomics and traditional medicine: new aspect in explanation of temperaments.  
581 Complement Med Res. 2014;21(4):250-3.
- 582 12. Chon TY, Lee MC. Acupuncture Mayo Clinic proceedings. 2013;88(10):1141-6.
- 583 13. Azizkhani M, Dastjerdi MV, Arani MT, Pirjani R, Sepidarkish M, Ghorat F, et al.  
584 Traditional Dry Cupping Therapy Versus Medroxyprogesterone Acetate in the Treatment of  
585 Idiopathic Menorrhagia: A Randomized Controlled Trial. Iran Red Crescent Med J.  
586 2018;20(2):e60508. doi: 10.5812/ircmj.60508.
- 587 14. Wang G, Ayati MH, Zhang W. Meridian studies in China: a systematic review. J  
588 Acupunct Meridian Stud. 2010;3(1):1-9.
- 589 15. Longhurst JC. Defining meridians: a modern basis of understanding. J Acupunct  
590 Meridian Stud. 2010;3(2):67-74.
- 591 16. Bai Y, Wang J, Wu J, Dai J, Sha O, Tai Wai Yew D, et al. Review of evidence suggesting  
592 that the fascia network could be the anatomical basis for acupoints and meridians in the human  
593 body. Evid Based Complement Alternat Med. 2011;2011:6. doi: 10.1155/2011/260510.
- 594 17. Ma W, Tong H, Xu W, Hu J, Liu N, Li H, et al. Perivascular space: possible anatomical  
595 substrate for the meridian. Journal of alternative and complementary medicine. 2003;9(6):851-  
596 9.
- 597 18. Chen C, Zhang D. Anti-inflammatory effects of 81 Chinese herb extracts and their  
598 correlation with the characteristics of traditional Chinese medicine. Evid Based Complement  
599 Alternat Med. 2014;2014:8. doi: <http://sci-hub.tw/10.1155/2014/985176>.
- 600 19. Jie Z, Lin T, Qian G, Jingyan M. General Medication Rules in Treating Spleen-  
601 stomach Disharmony Based on Traditional Chinese Medicine Inheritance Platform. World  
602 Chinese Medicine. 2016;1:048.

- 603 20. Cheng J. Chinese Herbal Medicine: Perspectives. Herbal Medicines: Springer; 2016.  
604 p. 225-35.
- 605 21. Fu X, Liu H, Wang P, Guan H. A study on the antioxidant activity and tissues  
606 selective inhibition of lipid peroxidation by saponins from the roots of *Platycodon grandiflorum*.  
607 *Am J Chin Med*. 2009;37(05):967-75.
- 608 22. Wang X, MorrisNatschke SL, Lee K. New developments in the chemistry and  
609 biology of the bioactive constituents of Tanshen. *Med Res Rev*. 2007;27(1):133-48.
- 610 23. Li Z, Xu S, Liu P. *Salvia miltiorrhiza* Burge (Danshen): A golden herbal medicine in  
611 cardiovascular therapeutics. *Acta Pharmacol Sin*. 2018;39:802-24.
- 612 24. Huang C, Zheng C, Li Y, Wang Y, Lu A, Yang L. Systems pharmacology in drug  
613 discovery and therapeutic insight for herbal medicines. *Brief Bioinform*. 2013;15(5):710-33.
- 614 25. Yang X, Qi M, Li Q, Chen L, Yu Z, Yang L. Information integration research on  
615 cumulative effect of 'Siqi, Wuwei, and Guijing' in Traditional Chinese Medicine. *J Tradit Chin Med*.  
616 2016;36(4):538-46.
- 617 26. Fu X, Mervin LH, Li X, Yu H, Li J, Mohamad Zobir SZ, et al. Toward understanding  
618 the cold, hot, and neutral nature of Chinese Medicines using in silico mode-of-action analysis. *J*  
619 *Chem Inf Model*. 2017;57(3):468-83.
- 620 27. Wang M, Li L, Yu C, Yan A, Zhao Z, Zhang G, et al. Classification of Mixtures of  
621 Chinese Herbal Medicines Based on a Self-Organizing Map (SOM). *Mol Inform*.  
622 2016;35(3-4):109-15.
- 623 28. Cortes C, Vapnik V. Support vector networks. *Mach Learn*. 1995;20:273-97.
- 624 29. Quinlan JR. C4. 5: programs for machine learning: Elsevier; 2014.
- 625 30. Liaw A, Wiener MJRn. Classification and regression by randomForest.  
626 2002;2(3):18-22.
- 627 31. Breiman L. Random forests. *Mach Learn*. 2001;45(1):5-32.

- 628 32. Zhang H, Berg AC, Maire M, Malik J, editors. SVM-KNN: Discriminative nearest  
629 neighbor classification for visual category recognition. Computer Vision and Pattern  
630 Recognition, 2006 IEEE Computer Society Conference on; 2006: IEEE.
- 631 33. Huang L, Xie D, Yu Y, Liu H, Shi Y, Shi T, et al. TCMID 2.0: a comprehensive resource  
632 for TCM. Nucleic acids research. 2017;46(D1):D1117-D20.
- 633 34. O'Boyle NM, Banck M, James CA, Morley C, Vandermeersch T, Hutchison GR. Open  
634 Babel: An open chemical toolbox. J Cheminform. 2011;3(1):33.
- 635 35. Yap CW. PaDEL-descriptor: An open source software to calculate molecular  
636 descriptors and fingerprints. J Comput Chem. 2011;32(7):1466-74.
- 637 36. Han L, Wang Y, Bryant SH. Developing and validating predictive decision tree  
638 models from mining chemical structural fingerprints and high-throughput screening data in  
639 PubChem. J BMC bioinformatics. 2008;9(1):401.
- 640 37. Durant JL, Leland BA, Henry DR, Nourse JG. Reoptimization of MDL keys for use in  
641 drug discovery. J Chem Inf Comput Sci. 2002;42(6):1273-80.
- 642 38. Hall LH, Kier LB. Electrotopological state indices for atom types: a novel  
643 combination of electronic, topological, and valence state information. J Chem Inf Comput Sci.  
644 1995;35(6):1039-45.
- 645 39. Rogers D, Hahn M. Extended-connectivity fingerprints. J Chem Inf Model.  
646 2010;50(5):742-54.
- 647 40. <http://www.daylight.com/dayhtml/doc/theory/theory.smarts.html>.
- 648 41. Lipinski CA, Lombardo F, Dominy BW, Feeney PJ. Experimental and computational  
649 approaches to estimate solubility and permeability in drug discovery and development settings.  
650 Adv Drug Deliv Rev. 1997;23(1-3):3-25.



- 651 42. Daina A, Michielin O, Zoete V. SwissADME: a free web tool to evaluate  
652 pharmacokinetics, drug-likeness and medicinal chemistry friendliness of small molecules. Sci  
653 Rep. 2017;7:42717.
- 654 43. Delaney JS. ESOL: estimating aqueous solubility directly from molecular structure.  
655 J Chem Inf Comput Sci. 2004;44(3):1000-5.
- 656 44. Ali J, Camilleri P, Brown MB, Hutt AJ, Kirton SB. Revisiting the General Solubility  
657 Equation: In Silico Prediction of Aqueous Solubility Incorporating the Effect of Topographical  
658 Polar Surface Area. J Chem Inf Model. 2012;52(2):420-8.
- 659 45. Yugandhar P, Kumar KK, Neeraja P, Savithamma N. Isolation, characterization and  
660 in silico docking studies of synergistic estrogen receptor a anticancer polyphenols from  
661 *Syzygium alternifolium* (Wt.) Walp. J Intercult Ethnopharmacol. 2017;6(3):296.
- 662 46. Bibi S, Sakata K. An Integrated Computational Approach for Plant-Based Protein  
663 Tyrosine Phosphatase Non-Receptor Type 1 Inhibitors. Curr Comput Aided Drug Des.  
664 2017;13(4):319-35.
- 665 47. Wang C, Ren Q, Chen X-T, Song Z-Q, Ning Z-C, Gan J-H, et al. System pharmacology-  
666 based strategy to decode the synergistic mechanism of Zhi-zhu Wan for functional dyspepsia.  
667 Front Pharmacol. 2018;9:841.
- 668 48. Mason DJ, Stott I, Ashenden S, Weinstein ZB, Karakoc I, Meral S, et al. Prediction of  
669 antibiotic interactions using descriptors derived from molecular structure. J Med Chem.  
670 2017;60(9):3902-12.
- 671 49. Wang Q, Li X, Yang H, Cai Y, Wang Y, Wang Z, et al. In silico prediction of serious  
672 eye irritation or corrosion potential of chemicals. RSC Adv. 2017;7(11):6697-703.
- 673 50. Kuhn M. Caret package. J Stat Softw. 2008;28(5):1-26.
- 674 51. Gevrey M, Dimopoulos I, Lek S. Review and comparison of methods to study the  
675 contribution of variables in artificial neural network models. Ecol Modell. 2003;160(3):249-64.

- 676 52. Ferrari T, Cattaneo D, Gini G, Golbamaki Bakhtyari N, Manganaro A, Benfenati E.  
677 Automatic knowledge extraction from chemical structures: the case of mutagenicity prediction.  
678 SAR QSAR Environ Res. 2013;24(5):365-83.
- 679 53. Xue X, Huang X, Gao N, Liu E, Ren L-y. Effects of Huoxiang Zhengqi Liquid on  
680 Expression of ZO-1 in Ileum Mucosa of Rats with Dampness Retention Syndrome. Chinese  
681 Journal of Experimental Traditional Medical Formulae. 2011;16:069.
- 682 54. Committee NP. Pharmacopoeia of the People's Republic of China. Part.  
683 2010;1:392-3.
- 684 55. Friendly M. Corrgrams: Exploratory displays for correlation matrices. Am Stat.  
685 2002;56(4):316-24.
- 686 56. Wei T, Simko V. corrplot: Visualization of a correlation matrix. R package version  
687 073. 2013;230(231):11.
- 688 57. Niwattanakul S, Singthongchai J, Naenudorn E, Wanapu S. Using of Jaccard  
689 coefficient for keywords similarity. Proceedings of the International MultiConference of  
690 Engineers and Computer Scientists2013. p. 380-4.
- 691 58. Jafari M, Mirzaie M, Sadeghi M. Interlog protein network: an evolutionary  
692 benchmark of protein interaction networks for the evaluation of clustering algorithms. BMC  
693 Bioinformatics. 2015;16(1):319.
- 694 59. Zhang A, Sun H, Wang X. Mass spectrometry-driven drug discovery for  
695 development of herbal medicine. Mass Spectrom Rev. 2018;37(3):307-20.
- 696 60. Kubinyi H. Lipophilicity and drug activity. Progress in Drug Research/Fortschritte  
697 Der Arzneimittelforschung/Progrès Des Recherches Pharmaceutiques: Springer; 1979. p. 97-  
698 198.

- 699 61. Yeung KY, Ruzzo WL. Details of the adjusted rand index and clustering algorithms,  
700 supplement to the paper an empirical study on principal component analysis for clustering  
701 gene expression data. *Bioinformatics*. 2001;17(9):763-74.
- 702 62. Rodrigues T, Reker D, Schneider P, Schneider G. Counting on natural products for  
703 drug design. *Nat Chem*. 2016;8(6):531.
- 704 63. Z X. Modernization: One step at a time. *Nature*. 2011;480(7378):S90-2.
- 705 64. Zarin DA, Tse T, Williams RJ, Califf RM, Ide NC. The ClinicalTrials.gov results  
706 database—update and key issues. *The New England journal of medicine*. 2011;364(9):852-60.
- 707 65. Fung FY, Linn YC, Medicine A. Developing traditional Chinese medicine in the era  
708 of evidence-based medicine: current evidences and challenges. *Evid Based Complement*  
709 *Alternat Med*. 2015;2015:9.
- 710 66. Zhou S-S, Xu J, Zhu H, Wu J, Xu J-D, Yan R, et al. Gut microbiota-involved  
711 mechanisms in enhancing systemic exposure of ginsenosides by coexisting polysaccharides in  
712 ginseng decoction. *Sci Rep*. 2016;6:22474.
- 713 67. Zhang Q, Lin L, Ye W. Techniques for extraction and isolation of natural products:  
714 a comprehensive review. *Chinese medicine*. 2018;13(1):20.
- 715 68. Svetnik V, Liaw A, Tong C, Culberson JC, Sheridan RP, Feuston BP. Random forest:  
716 a classification and regression tool for compound classification and QSAR modeling. *J Chem Inf*  
717 *Comput Sci*. 2003;43(6):1947-58.
- 718 69. Gawehn E, Hiss JA, Schneider G. Deep learning in drug discovery. *Mol Inform*.  
719 2016;35(1):3-14.
- 720
- 721

722 **Supporting information**

723 **Fig S1.** Model performance of Random Forest on the real data as compared to permuted  
724 data at compound and herb levels. \*\*\*\*: p-value < 0.0001.

725 **Fig S2.** The importance scores grouped by the feature types according to Random Forest  
726 predictions for the seven Meridians at the compound level.

727 **Supplementary Table 1.** The 36 ADME properties based on the chemical structure of  
728 compounds.

729 **Supplementary Table 2.** The Meridians and other TCM annotations for the 646 herbs.

730 **Supplementary Table 3.** The prediction performances for the combinations of data levels,  
731 feature types and machine learning methods.

732 **Supplementary Table 4.** Top 30 important ADME features, fingerprint bits and important  
733 substructure fragments for each Meridian determined at the compound level.

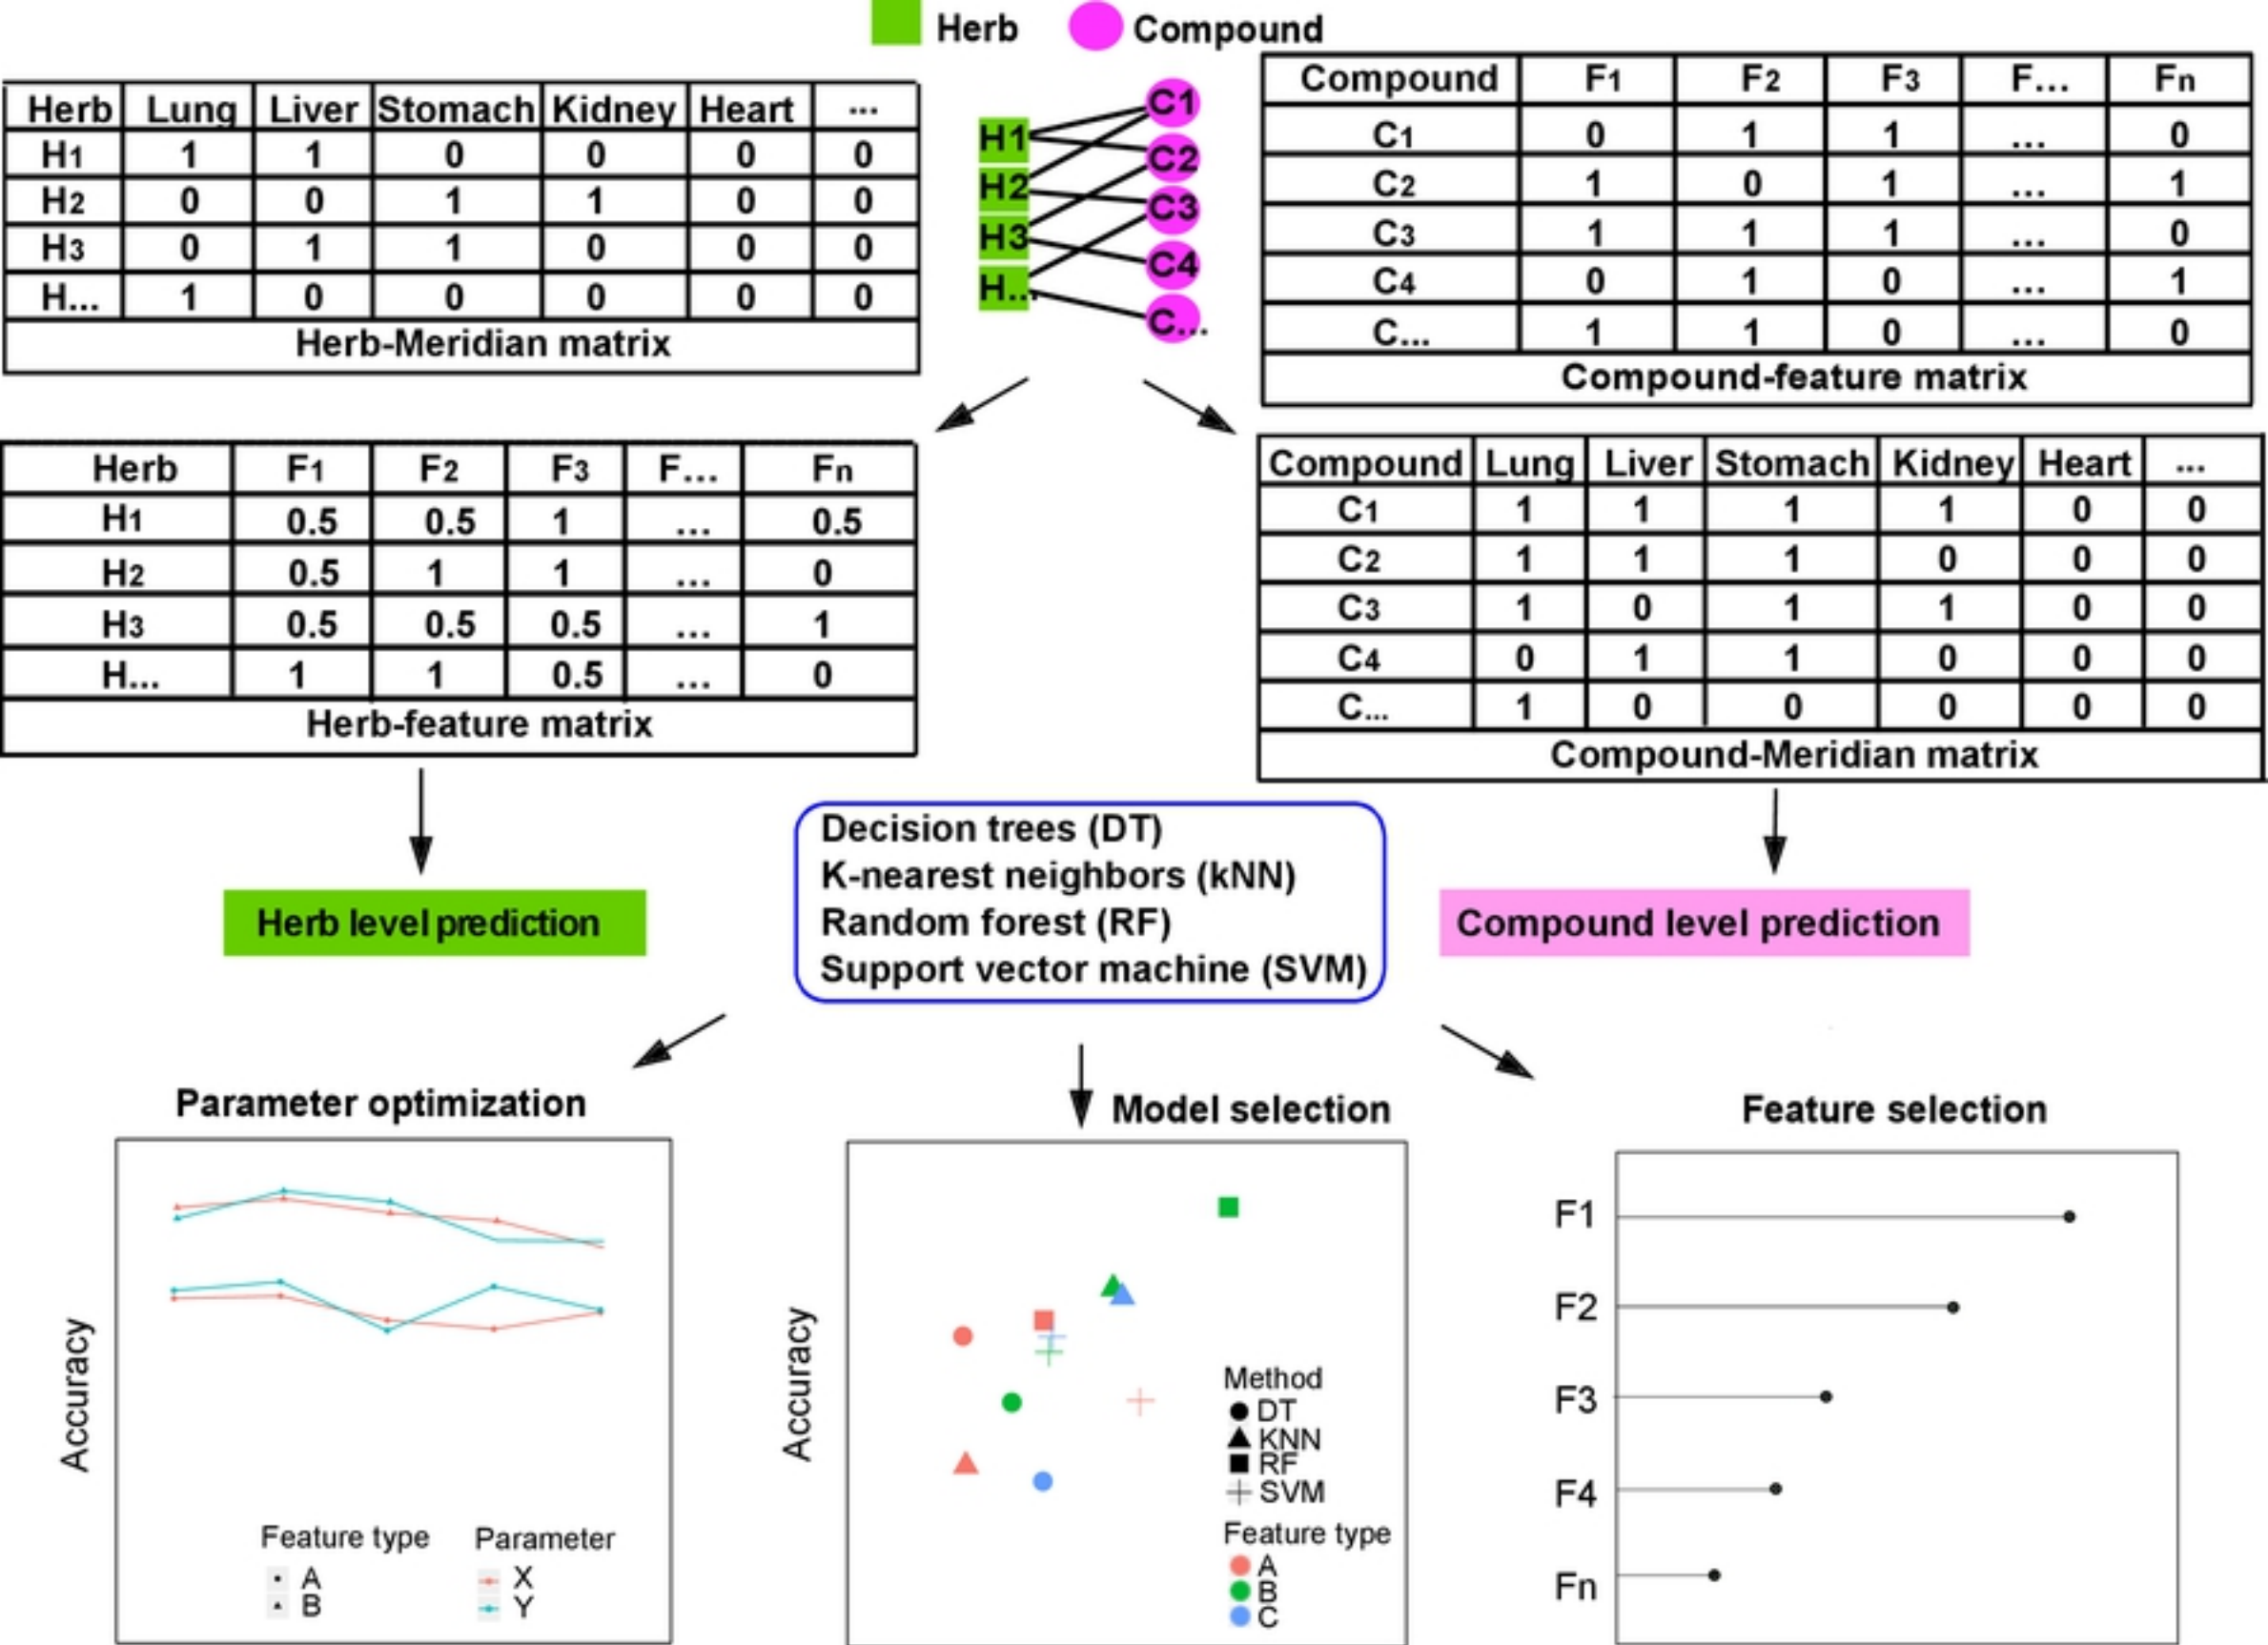

Figure 1

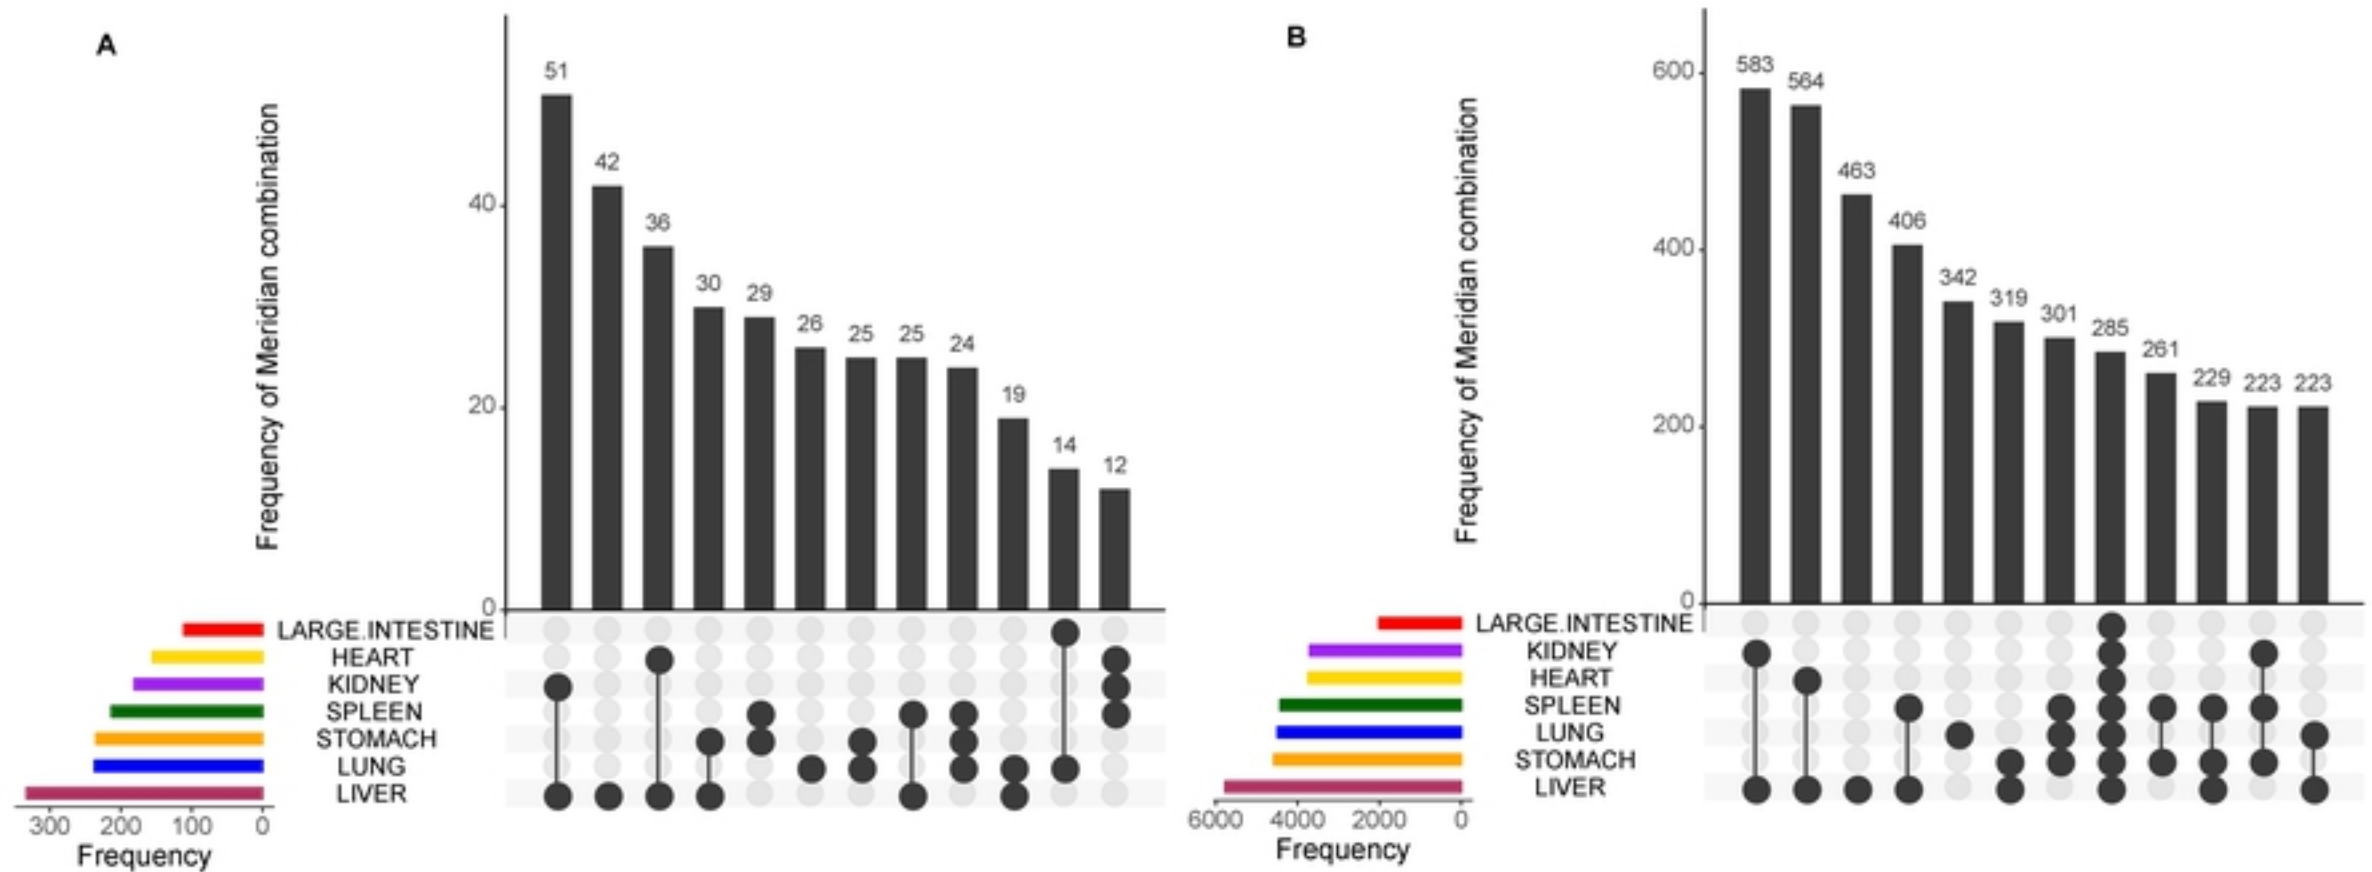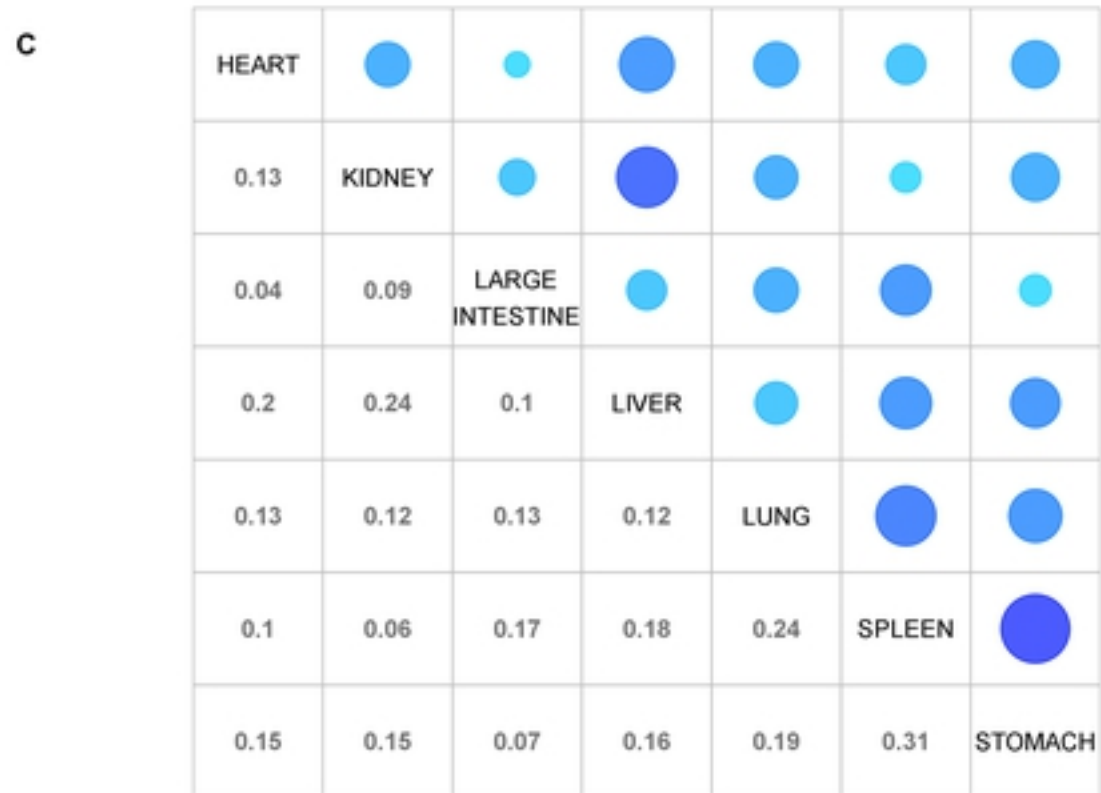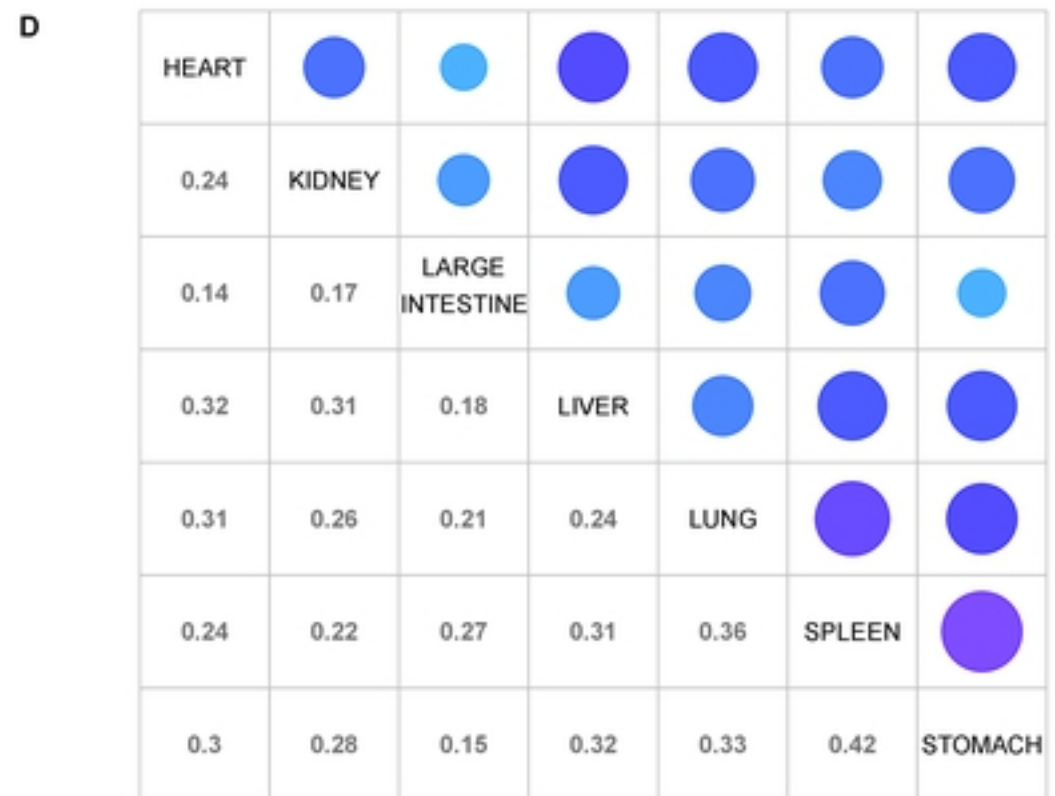

Figure2

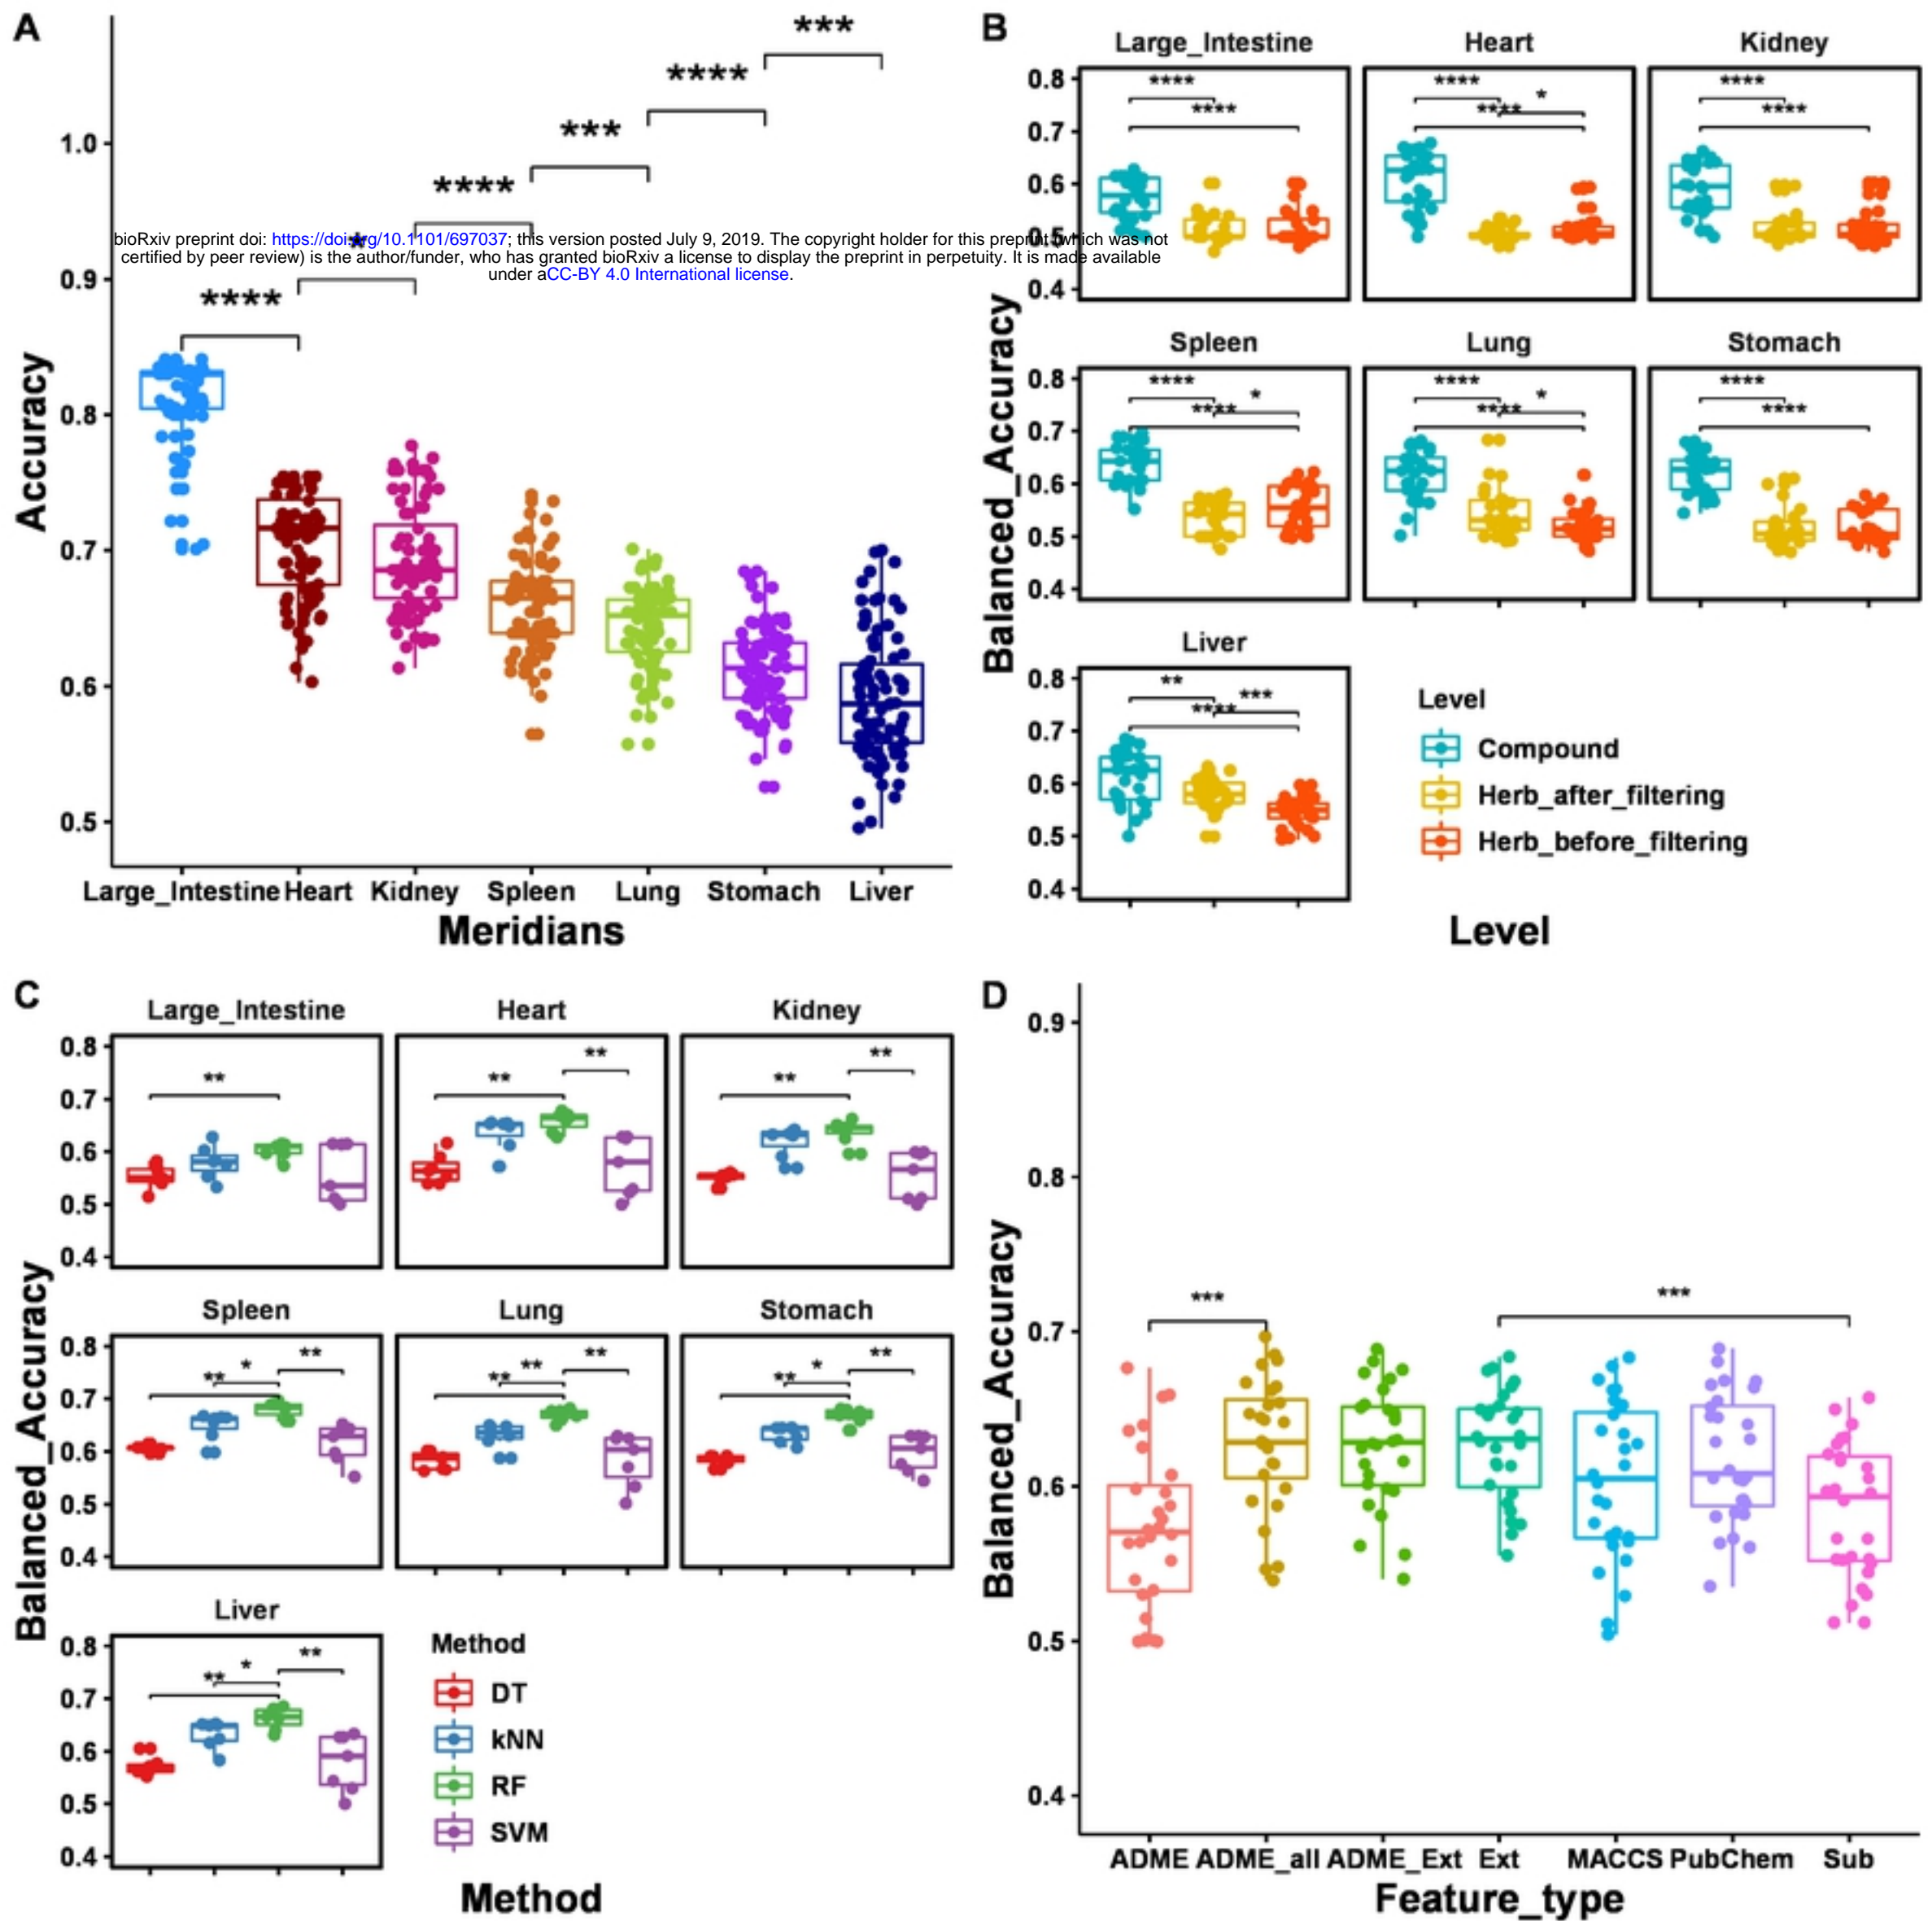

Figure3

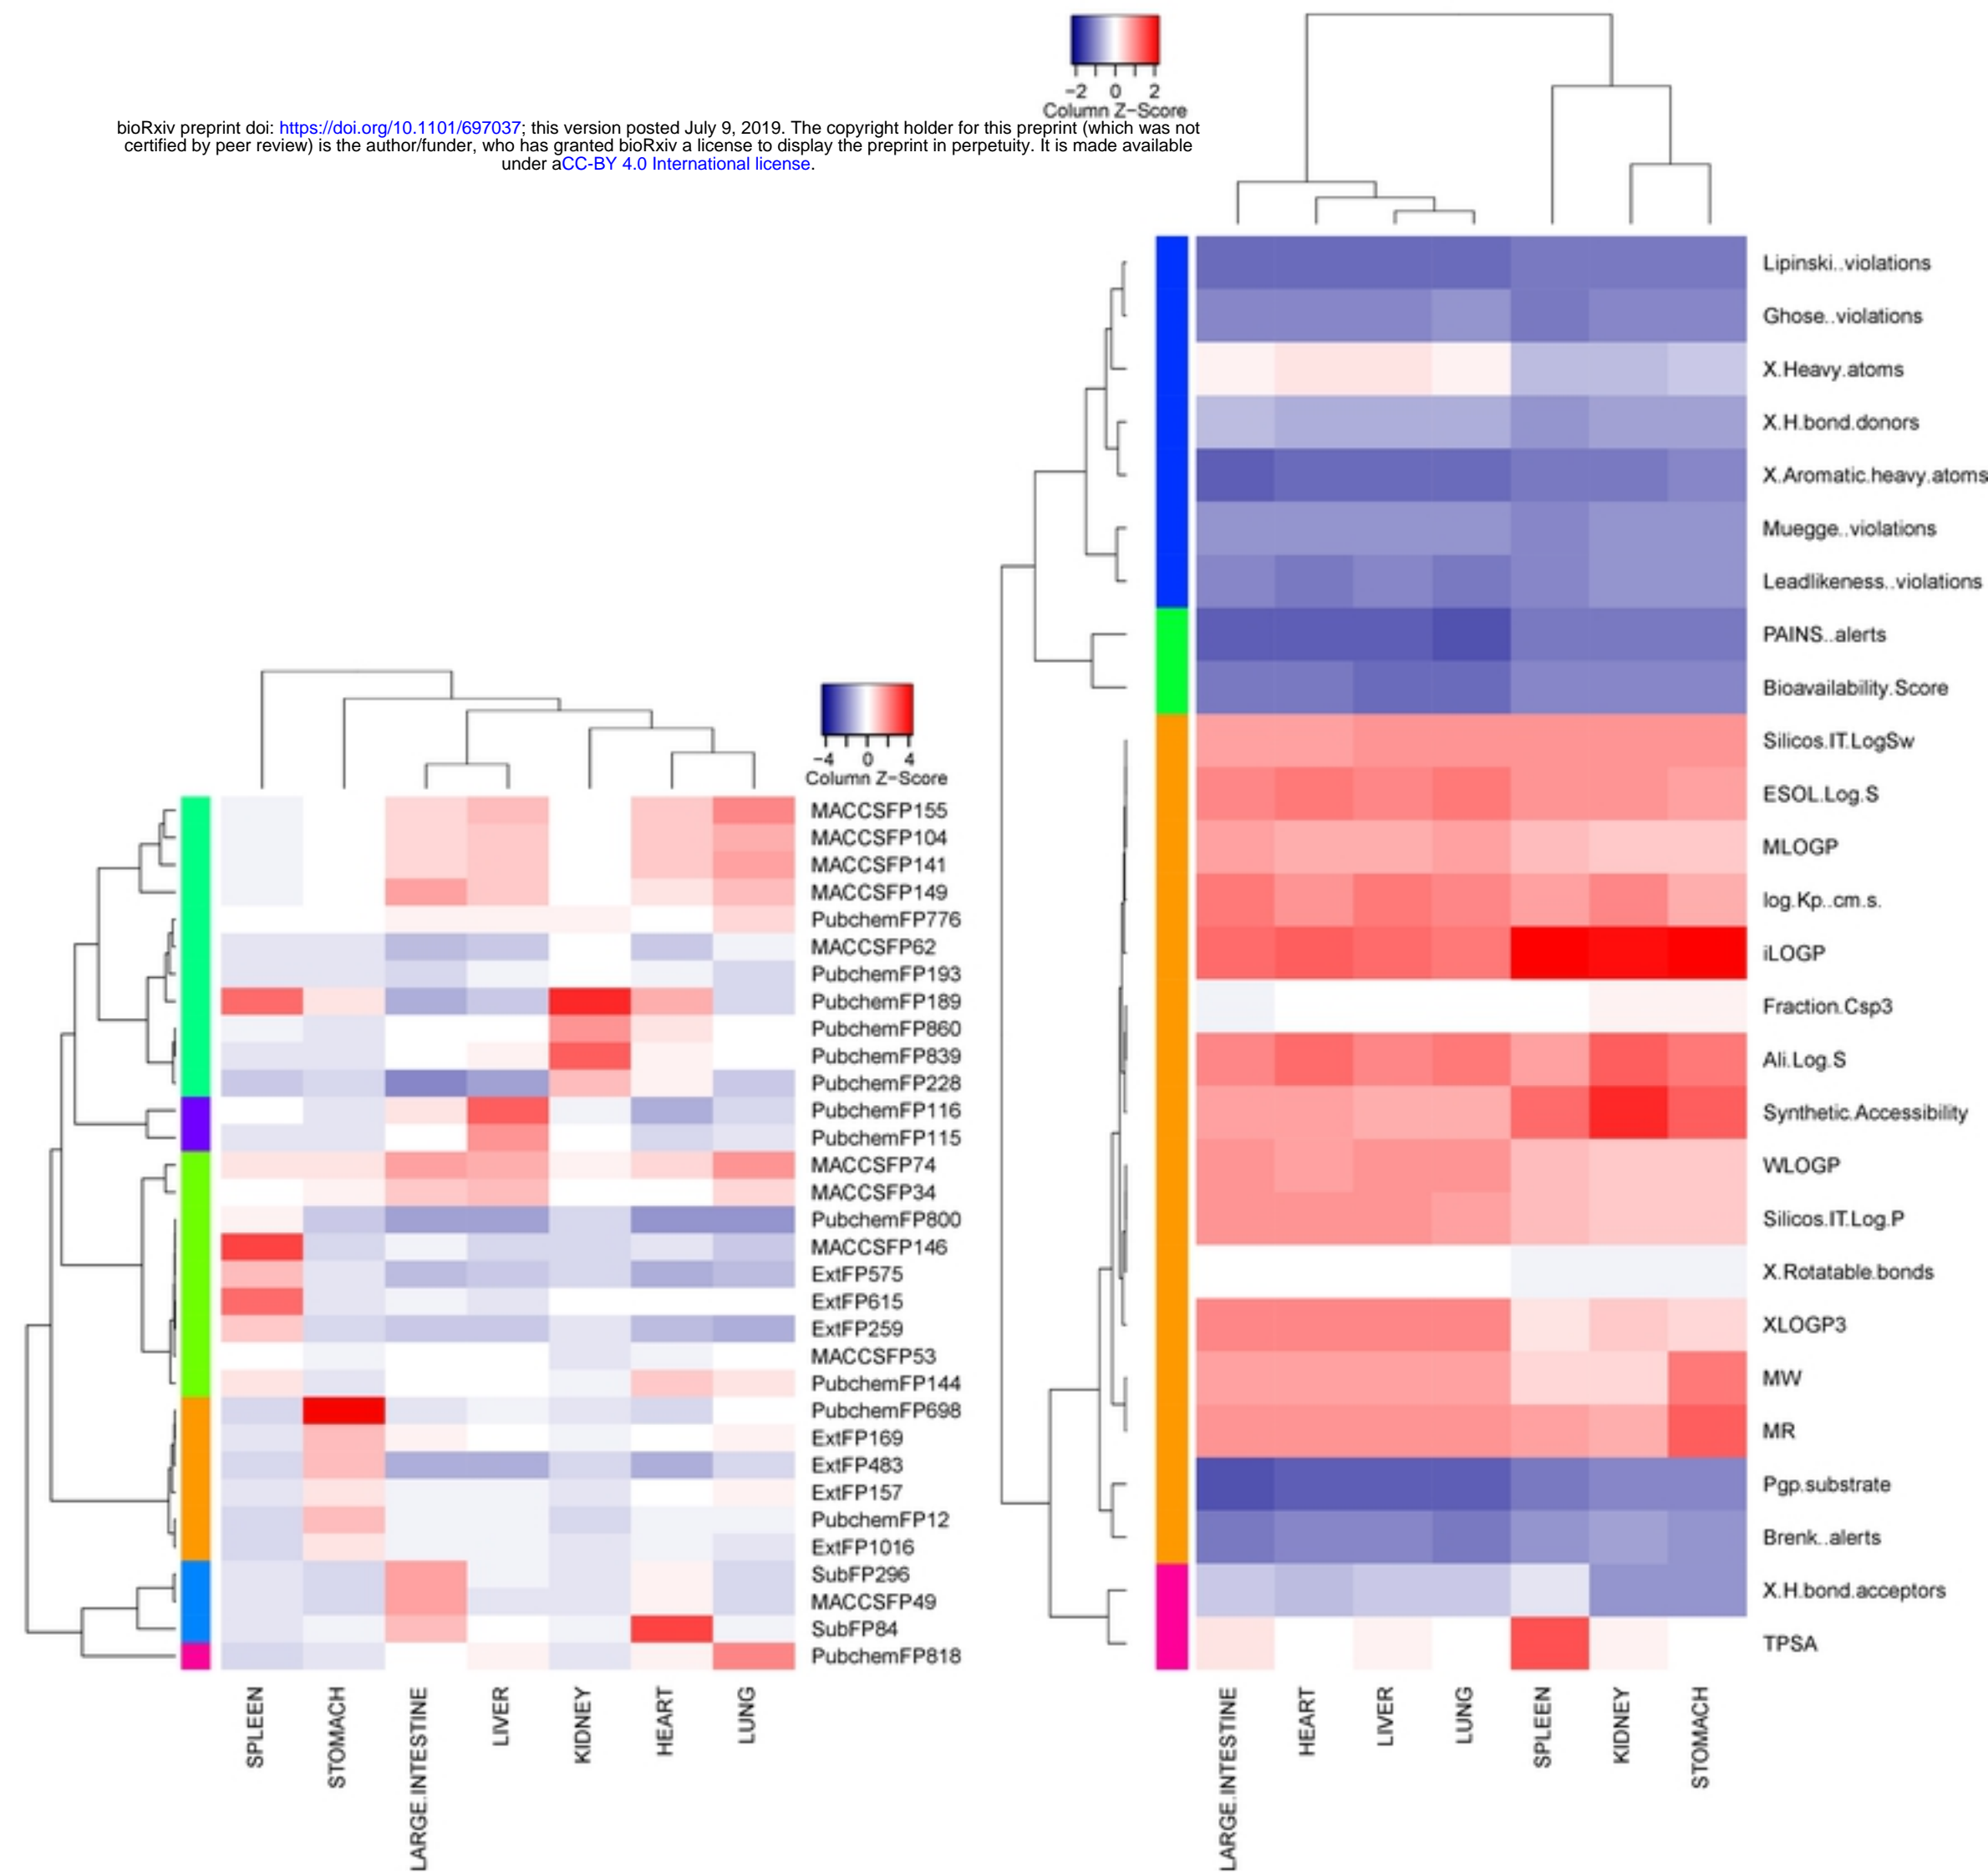

Figure4
